# Supplementary material for: Bis-vinyl selenides obtained via iron(iii) catalyzed addition of PhSeSePh to alkynes: synthesis and antinociceptive activity
Source: Royal Society of Chemistry journal article supplement (doi:10.1039/c2ob27064a), 2012-12-11

# Bis-vinyl Selenides Obtained via Iron(III) Catalyzed Addition of PhSeSePh to Alkynes: Synthesis and Antinociceptive Activity

José S. S. Neto,<sup>1</sup> Glaubia Sartori,<sup>1</sup> Ana P. Pesarico,<sup>1</sup> Davi Back,<sup>1</sup> Cristina Nogueira<sup>1</sup> and Gilson Zeni<sup>1\*</sup>

\*Fax: +55 55 3220 9611 E-mail : gzeni@quimica.ufsm.br

<sup>1</sup>Laboratório de Síntese, Reatividade, Avaliação Farmacológica e Toxicológica de Organocalcogênicos, CCNE, Universidade Federal de Santa Maria, Santa Maria, Rio Grande do Sul, Brazil, 97105-900.

## SUPPORTING INFORMATION

### Materials and Methods

Proton nuclear magnetic resonance spectra (<sup>1</sup>H NMR) were obtained at 200 MHz on a DPX-200 NMR spectrometer or at 400 MHz on a DPX-400 NMR spectrometer. Spectra were recorded in CDCl<sub>3</sub> solutions. Chemical shifts are reported in ppm, referenced to the solvent peak of CDCl<sub>3</sub> or tetramethylsilane (TMS) as the external reference. Data are reported as follows: chemical shift ( $\delta$ ), multiplicity, coupling constant (*J*) in Hertz and integrated intensity. Carbon-13 nuclear magnetic resonance spectra (<sup>13</sup>C NMR) were obtained either at 50 MHz on a DPX-200 NMR spectrometer or at 100 MHz on a DPX-400 NMR spectrometer. Spectra were recorded in CDCl<sub>3</sub> solutions. Chemical shifts are reported in ppm, referenced to the solvent peak of CDCl<sub>3</sub>. Abbreviations to denote the multiplicity of a particular signal are s (singlet), d (doublet), t (triplet), q (quartet), quint (quintet), sex (sextet), dt (double triplet), td (triple doublet) and m (multiplet). High resolution mass spectra were recorded on a Kratos MS50TC double focusing magnetic sector mass spectrometer using EI at 70 eV. Column chromatography was performed using Merck Silica Gel (230-400 mesh) following the methods described by Still.<sup>1</sup> Thin layer chromatography (TLC) was performed using Merck Silica Gel GF<sub>254</sub>, 0.25 mm thickness. For visualization, TLC plates were either placed under ultraviolet light, or stained with iodine vapor, or acidic vanillin. Most reactions were monitored by TLC for disappearance of starting material. The following solvents were dried and purified by distillation from the reagents indicated: tetrahydrofuran from sodium with a benzophenone ketyl indicator. All other solvents were ACS or HPLC grade unless otherwise noted. Air- and moisture-sensitive reactions were conducted in flame-dried or oven dried glassware equipped with tightly fitted rubber septa and under a positive atmosphere of dry nitrogen or argon.

<sup>(1)</sup> Still, W.C., Kahn, M., Mitra, A.; *J. Org. Chem.* **1978**, *43*, 2923.

All synthesized and tested compounds were obtained in purity superior to 98% determined by combustion analysis, HPLC and gas chromatography. Reagents and solvents were handled using standard syringe techniques. Temperatures above room temperature were maintained by use of a mineral oil bath with an electrically heated coil connected to a Variac controller.

**Table 1. Effect of different pretreatment times with bis-vinyl selenides administered to mice in the formalin test.**

| Groups    | Time (min) | Formalin       |                 | Edema(mm)      |
|-----------|------------|----------------|-----------------|----------------|
|           |            | First (sec)    | Second (sec)    |                |
| Control   |            | 70.5 (± 3.19)  | 152.3 (± 0.63)  | 0.06 (± 0.003) |
| <b>3t</b> |            |                |                 |                |
|           | 30         | 48.3* (± 6.08) | 95.5 (± 29.06)  | 0.05 (± 0.009) |
|           | 60         | 31.2* (± 3.96) | 37.25* (± 22.4) | 0.05 (± 0.005) |
| <b>3f</b> |            |                |                 |                |
|           | 30         | 77 (± 12.7)    | 133 (± 12.7)    | 0.06 (± 0.006) |
|           | 60         | 73.4 (± 9.64)  | 183 (± 9.64)    | 0.05 (± 0.005) |
| <b>3h</b> |            |                |                 |                |
|           | 30         | 48* (± 2.8)    | 76* (± 9.01)    | 0.06 (± 0.005) |
|           | 60         | 57.3 (± 6.94)  | 90.7* (± 9.21)  | 0.05 (± 0.007) |
| <b>3a</b> |            |                |                 |                |
|           | 30         | 34.5* (± 5.13) | 145 (± 5.13)    | 0.05 (± 0.004) |
|           | 60         | 36* (± 9.73)   | 131.6 (± 9.73)  | 0.06 (± 0.008) |
| <b>3d</b> |            |                |                 |                |
|           | 30         | 58.8 (± 10.64) | 106* (± 9.07)   | 0.05 (± 0.004) |
|           | 60         | 44.1 (± 7.04)  | 96.7* (± 18.1)  | 0.06 (± 0.006) |

Bis-vinyl selenides were administered at a dose of 50 mg/kg (i.g.) at different pre-treatment times before the formalin test. Data are reported as the mean ± S.E.M. of 5-7 animals. Asterisks denote the significance levels, when compared to the control group (One-way ANOVA followed by the Duncan's test) (\*)  $p < 0.05$ .

**Table 2. Effect of a single acute dose of bis-vinyl selenides administered to mice on parameters of toxicity.**

| Groups    | AST <sup>a</sup> | ALT <sup>a</sup> | Urea <sup>b</sup> | δ- ALA-D <sup>c</sup> |             | Na,K ATPase <sup>d</sup> |
|-----------|------------------|------------------|-------------------|-----------------------|-------------|--------------------------|
|           |                  |                  |                   | Hepatic               | Cerebral    |                          |
| Control   | 170.73(±0.38)    | 50.54(±1.57)     | 25.5(±1.004)      | 24.0 (±0.30)          | 5.17(±0.43) | 27.32(±0.50)             |
| <b>3t</b> | 144.68(±16.81)   | 51.15(±2.10)     | 25.0(±1.21)       | 22.75 (±0.73)         | 4.01(±0.27) | 32.47(±3.75)             |
| <b>3f</b> | 256.43*(±29.71)  | 43.15(±8.14)     | 20.1(±2.08)       | 20.7*(±1.34)          | 5.75(±0.48) | 26.8(±5.79)              |
| <b>3h</b> | 189.7(±13.11)    | 61.5(±7.52)      | 29.4(±1.60)       | 24.16 (±0.87)         | 5.5(±0.81)  | 29.7(±5.9)               |
| <b>3a</b> | 188.32(±20.55)   | 45.43(±2.80)     | 22.9(±2.10)       | 24.83(±1.625)         | 5.51(±0.38) | 31.92(±5.52)             |
| <b>3d</b> | 188.27(±36.87)   | 47.0(±2.21)      | 23.9(±1.95)       | 24.78 (±2.25)         | 5.41(±0.21) | 26.57(±2.24)             |

Bis-vinyl selenides were administered at a dose of 50 mg/kg (i.g.), 72h after administration the parameters of toxicity were determined in mice. Data are reported as the mean ± S.E.M. of 5-7 animals. Asterisks denote the significance levels, when compared to the control group (Student t test) (\*)  $p < 0.05$  <sup>a</sup> expressed as UI/l, <sup>b</sup> expressed as mg/dl, <sup>c</sup> expressed as nmol PBG/mg protein/h, <sup>d</sup> expressed as nmol de Pi/mg protein/min.

### General Procedure for the Preparation of the bis-vinyl-chalcogenides.

To a Schlenk tube, under ambient atmosphere, containing a mixture of the appropriate diorganoyl dichalcogenide (0.55 equiv) in CH<sub>3</sub>NO<sub>2</sub> (0.5 mL) was added, at room temperature, the FeCl<sub>3</sub> (0.1 equiv, 10

mol%). The resulting solution was stirred for 15 min at this temperature. After that the corresponding alkyne (0.5 mmol) in  $\text{CH}_3\text{NO}_2$  (0.5 mL) was added and resulting solution was stirred under reflux for 12 hours. The reaction mixture was diluted with ethyl acetate (20 mL) and washed with a saturated solution of  $\text{NH}_4\text{Cl}$  (3 x 10 mL). The organic phase was separated, dried over  $\text{MgSO}_4$ , and concentrated under vacuum. The residue was purified by flash chromatography eluted with hexane/acetate (95:5).

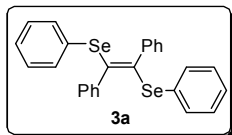

**(E)-1,2-diphenyl-1,2-bis(phenylselenenyl)ethene (3a):** Yield: 0.226g (92%). White solid. mp = 155-158 °C.  $^1\text{H}$  RMN ( $\text{CDCl}_3$ , 400 MHz),  $\delta$  (ppm): 7.24-7.21 (m, 4H), 7.19-7.03 (m, 12H), 7.01-6.96 (m, 4H). RMN  $^{13}\text{C}$  ( $\text{CDCl}_3$ , 100 MHz),  $\delta$  (ppm): 140.5, 135.0, 133.1, 130.0, 129.5, 128.3, 127.6, 127.4, 102.3. MS (relative intensity)  $m/z$ : 492 (13), 335 (25), 254 (27), 178 (100), 152 (19), 77 (10). Anal. (%) calcd. for  $\text{C}_{26}\text{H}_{20}\text{Se}_2$ : C 63.68, H 4.110. Found: C 63.74, H 4.18.

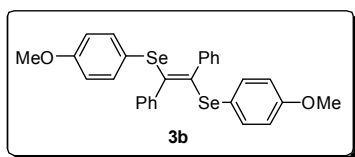

**(E)-1,2-bis(4-methoxyphenylselenenyl)-1,2-diphenylethene(3b):** Yield: 0.165g (60%). Yellow solid. mp = 164-167 °C.  $^1\text{H}$  RMN ( $\text{CDCl}_3$ , 400 MHz),  $\delta$  (ppm): 7.20-7.11 (m, 10H), 7.08-7.05 (m, 4H), 6.54-6.49 (m, 4H), 3.68 (s, 6H).  $^{13}\text{C}$  RMN ( $\text{CDCl}_3$ , 50 MHz),  $\delta$  (ppm): 159.9, 140.5, 137.2, 132.5, 129.4, 127.7, 127.2, 120.3, 113.9, 55.1. MS (relative intensity)  $m/z$ : 552 (9), 373 (7), 365 (25), 281 (30), 253 (25), 207 (100), 186 (58), 178 (75), 133 (17), 77 (99). Anal. HRMS calcd. for  $\text{C}_{28}\text{H}_{24}\text{O}_2\text{Se}_2$  ( $\text{M}+\text{Na}^+$ ): 552.0107. Found: 552.0113.

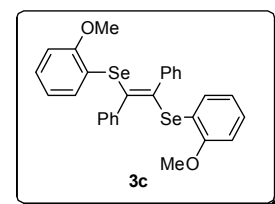

**(E)-1,2-bis(2-methoxyphenylselenenyl)-1,2-diphenylethene (3c):** Yield: 0.196g (71%). White solid. mp = 156-159 °C.  $^1\text{H}$  RMN ( $\text{CDCl}_3$ , 200 MHz),  $\delta$  (ppm): 7.37-7.25 (m, 6H), 7.16-7.07 (m, 8H), 6.71-6.63 (m, 2H), 6.58-6.53 (m, 2H), 3.69 (s, 6H).  $^{13}\text{C}$  RMN ( $\text{CDCl}_3$ , 50 MHz),  $\delta$  (ppm): 158.2, 141.2, 135.5, 133.5, 129.4, 129.0, 128.9, 127.3, 127.2, 120.7, 119.9, 110.2, 55.5. MS (relative intensity)  $m/z$ : 551 (17), 365 (29), 284 (14), 207 (21), 178 (100), 159 (17), 107 (36), 77 (33). Anal. HRMS calcd. for  $\text{C}_{28}\text{H}_{24}\text{O}_2\text{Se}_2$  ( $\text{M}+\text{Na}^+$ ): 551.0107. Found: 552.0117.

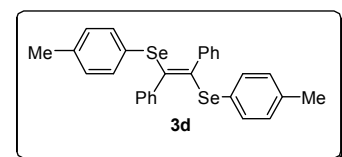

**(E)-1,2-diphenyl-1,2-bis(p-tolylselenenyl)ethene (3d):** Yield: 0.195g (75%). Yellow solid. mp = 133-136 °C.  $^1\text{H}$  RMN ( $\text{CDCl}_3$ , 200 MHz),  $\delta$  (ppm): 7.32-7.08 (m, 10H), 7.05 (d,  $J = 8.1$  Hz, 4H), 6.79 (d,  $J = 7.8$  Hz, 4H), 2.17 (s, 6H).  $^{13}\text{C}$  RMN ( $\text{CDCl}_3$ , 100 MHz),  $\delta$  (ppm): 140.8, 137.3, 135.1, 133.0, 125.5, 129.1, 129.6, 127.3, 126.4, 21.0. MS (relative intensity)  $m/z$ : 518 (16), 353 (7), 372 (16), 353 (12), 207 (28), 178 (100), 152 (22), 133 (5), 76 (4). Anal. (%) calcd. for  $\text{C}_{28}\text{H}_{24}\text{Se}_2$ : C 64.87, H 4.67. Found: C 64.96, H 4.72.

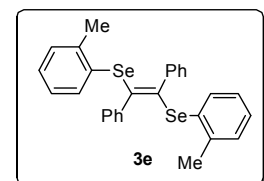

**(E)-1,2-diphenyl-1,2-bis(o-tolylselenenyl)ethene (3e):** Yield: 0.182g (70%). White solid. mp = 190-193 °C.  $^1\text{H}$  RMN ( $\text{CDCl}_3$ , 400 MHz),  $\delta$  (ppm): 7.25-7.20 (m, 5H), 7.16-7.09 (m, 5H), 6.97-6.95 (m, 2H), 6.84-6.80 (m, 2H), 2.23 (s, 6H).  $^{13}\text{C}$  RMN ( $\text{CDCl}_3$ , 50 MHz),  $\delta$  (ppm): 141.3, 140.9, 136.6, 133.5, 131.0, 129.5, 129.0,

128.1, 127.48, 127.3, 125.8, 22.8. MS (relative intensity)  $m/z$ : 520 (7), 349 (16), 281 (27), 253 (28), 107 (100), 178 (80), 152 (19), 133 (17), 91 (66), 73 (40). Anal. (%) calcd. for  $C_{28}H_{24}Se_2$ : C 64.87, H 4.67. Found: C 64.93, H 4.71.

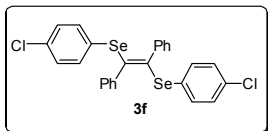

**(E)-1,2-bis(4-chlorophenylselenenyl)-1,2-diphenylethene (3f):** Yield: 0.179g (65%). Yellow solid. mp = 178-181 °C.  $^1H$  RMN ( $CDCl_3$ , 200 MHz),  $\delta$  (ppm): 7.23-7.13 (m, 10H), 7.08 (d,  $J = 8.3$  Hz, 4H), 6.96 (d,  $J = 8.6$  Hz, 4 H).  $^{13}C$  RMN ( $CDCl_3$ , 100 MHz),  $\delta$  (ppm): 140.2, 136.3, 133.9, 133.1, 129.4, 129.1, 128.1, 129.9, 127.7. MS (relative intensity)  $m/z$ : 553 (5), 348 (15), 281 (927), 253 (21), 214 (12), 207 (100), 176 (28), 151 (10), 96 (3), 91 (54), 73 (40). Anal. HRMS calcd. for  $C_{26}H_{18}Cl_2Se_2$  ( $M+Na^+$ ): 559.9113. Found: 559.9141.

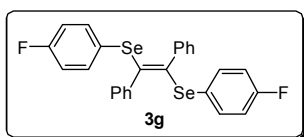

**(E)-1,2-bis(4-fluorophenylselenenyl)-1,2-diphenylethene (3g):** Yield: 0.198g (75%). White solid. mp = 134-137 °C.  $^1H$  RMN ( $CDCl_3$ , 400 MHz),  $\delta$  (ppm): 7.22-7.01 (m, 14H), 6.71-6.65 (m, 4H),  $^{13}C$  RMN ( $CDCl_3$ , 100 MHz),  $\delta$  (ppm): 162.5 (d,  $^1J = 248$  Hz), 140.2, 135.5 (d,  $^3J = 8.7$  Hz), 132.7, 128.4, 127.8, 127.6, 124.5 (d,  $^4J = 3.6$  Hz), 115.5 (d,  $^2J = 21.9$  Hz). MS (relative intensity)  $m/z$ : 528 (8), 353 (20), 281 (4), 253 (28), 207 (100), 178 (80), 152 (19), 133 (917), 91 (66), 73 (40). Anal. (%) calcd. for  $C_{26}H_{18}F_2Se_2$ : C 59.33, H 3.45. Found: C 59.48, H 3.51.

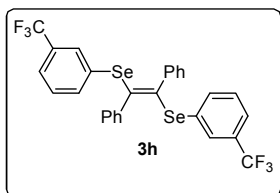

**(E)-1,2-diphenyl-1,2-bis(3-(trifluoromethyl)phenylselenenyl)ethene (3h):** Yield: 0.255g (81%). White solid. mp = 128-131 °C.  $^1H$  RMN ( $CDCl_3$ , 400 MHz),  $\delta$  (ppm): 7.39-7.35 (m, 4H), 7.32-7.29 (m, 2H), 7.25-7.08 (m, 12H).  $^{13}C$  RMN ( $CDCl_3$ , 100 MHz),  $\delta$  (ppm): 139.8, 138.1, 133.0, 131.8 (q,  $J = 4.4$  Hz), 131.0, 130.7 (q,  $J = 32.2$  Hz), 129.4, 128.6, 128.0, 127.9, 124.2 (q,  $J = 3.6$  Hz), 123.5 (q,  $J = 272.2$  Hz). MS (relative intensity)  $m/z$ : 628 (3), 625 (7), 403 (16), 363 (9), 322 (8), 178 (100), 152 (13), 126 (34). Anal. HRMS calcd. for  $C_{28}H_{18}F_6Se_2$  ( $M+Na^+$ ): 697.9643. Found: 697.9758.

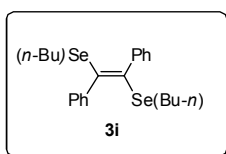

**(E)-1,2-bis(butylselenenyl)-1,2-diphenylethene (3i):** Yield: 0.132g (58%). Yellow solid. mp = 80-83 °C.  $^1H$  RMN ( $CDCl_3$ , 400 MHz),  $\delta$  (ppm): 7.41-7.35 (m, 8H), 7.32-7.28 (m, 2H), 2.14 (qui,  $J = 7.3$  Hz, 4H), 1.33 (qui,  $J = 7.6$  Hz, 4H), 1.12 (sex,  $J = 7.6$  Hz, 4H), 0.71 (t,  $J = 7.6$  Hz, 6H).  $^{13}C$  RMN ( $CDCl_3$ , 100 MHz),  $\delta$  (ppm): 141.1, 130.6, 129.5, 128.1, 127.5, 32.3, 27.0, 22.7, 13.4. MS (relative intensity)  $m/z$ : 352 (10), 304 (23), 228 (21), 207 (53), 178 (84), 152 (18), 91 (5), 55 (14). Anal. HRMS calcd. for  $C_{22}H_{28}Se_2$  ( $M+Na^+$ ): 452.0521. Found: 452.0530.

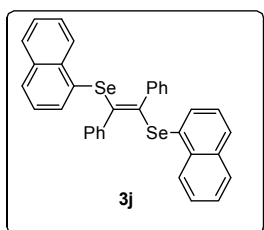

**(E)-1,2-bis(naphthalen-1-ylselenenyl)-1,2-diphenylethene (3j):** Yield: 0.151g (51%). White solid. mp = 167-170 °C.  $^1H$  RMN ( $CDCl_3$ , 200 MHz),  $\delta$  (ppm):

8.19 -8.12 (m, 2H), 7.71-7.54 (m, 4H), 7.51-7.38 (m, 6H), 7.12-6.95 (m, 12H).  $^{13}\text{C}$  RMN ( $\text{CDCl}_3$ , 100 MHz),  $\delta$  (ppm): 150.5, 135.7, 134.9, 133.7, 133.5, 129.5, 129.1, 129.0, 128.4, 128.2, 127.2, 126.3, 125.8, 125.1. MS (relative intensity)  $m/z$ : 392 (5), 304 (23), 228 (21), 207 (53), 178 (84), 152 (18), 128 (22), 126 (19) 115 (100), 77 (7). Anal. (%) calcd. for  $\text{C}_{34}\text{H}_{24}\text{Se}_2$ : C 69.16, H 4.10. Found: C 69.28, H 4.17.

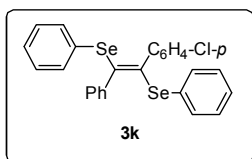

**(E)-(1-(4-chlorophenyl)-2-phenylethene-1,2-diyl)bis(phenylselene) (3k):** Yield: 0.255g (91%). White solid. mp = 80-83 °C.  $^1\text{H}$  RMN ( $\text{CDCl}_3$ , 400 MHz),  $\delta$  (ppm): 7.22-7.10 (m, 14H), 6.72-6.65 (m, 4H).  $^{13}\text{C}$  RMN ( $\text{CDCl}_3$ , 50 MHz),  $\delta$  (ppm): 140.5, 139.2, 135.1, 135.6, 134.7, 134.0, 133.2, 131.4, 130.9, 129.9, 129.4, 128.8, 128.6, 128.4, 127.9, 127.7, 127.6. MS (relative intensity)  $m/z$ : 525 (9), 368 (14), 333 (27), 331 (15), 252 (22), 211 (100), 176 (80), 156 (22), 150 (26), 77 (14). Anal. (%) calcd. for  $\text{C}_{26}\text{H}_{19}\text{ClSe}_2$ : C 59.60, H 3.65. Found: C 59.62, H 3.69.

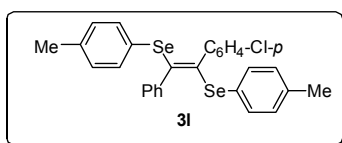

**(E)-(1-(4-chlorophenyl)-2-phenylethene-1,2-diyl)bis(p-tolylselene) (3l):** Yield: 0.177g (64%). White solid. mp = 135-138 °C.  $^1\text{H}$  RMN ( $\text{CDCl}_3$ , 200 MHz),  $\delta$  (ppm): 7.23-6.99 (m, 13H), 6.88-6.77 (m, 4H), 2.22-1.14 (m, 6H).  $^{13}\text{C}$  RMN ( $\text{CDCl}_3$ , 100 MHz),  $\delta$  (ppm): 140.7, 139.4, 137.7, 137.6, 135.2, 134.1, 133.0, 131.8, 130.9, 130.8, 129.5, 129.4, 129.2, 128.8, 127.8, 127.7, 127.4, 126.6, 126.2, 21.0 (2C). MS (relative intensity)  $m/z$ : 556 (5), 553 (10), 383 (19), 383 (19), 348 (31), 281 (16), 268 (10), 212 (86), 176 (59), 170 (20), 151 (21), 83 (10), 91 (100), 73 (25). Anal. HRMS calcd. for  $\text{C}_{29}\text{H}_{26}\text{ClSe}_2$  ( $\text{M}+\text{Na}^+$ ): 553.9819. Found: 553.9829.

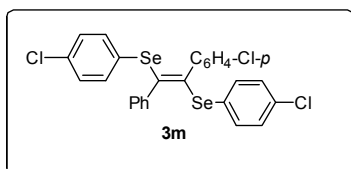

**(E)-(1-(4-chlorophenyl)-2-phenylethene-1,2-diyl)bis(4-chlorophenylselene) (3m):** Yield: 0.232g (78%). White solid. mp = 131-139 °C. RMN  $^1\text{H}$  ( $\text{CDCl}_3$ , 400 MHz),  $\delta$  (ppm): 7.23-7.14 (m, 9H), 7.01-7.05 (m, 4H), 7.02-6.95 (m, 4H). RMN  $^{13}\text{C}$  ( $\text{CDCl}_3$ , 100 MHz),  $\delta$  (ppm): 140.2, 138.8, 136.5, 136.27, 134.6, 134.3, 134.3, 133.7, 130.8, 129.4, 129.9, 128.7, 128.2, 127.9, 127.8. MS (relative intensity)  $m/z$ : 596 (4), 593 (5), 403 (12), 370 (10), 366 (11), 281 (17), 153 (16), 212 (100), 207 (62), 190 (21), 176 (70), 156 (14), 133 (11), 77 (7). Anal. HRMS calcd. for  $\text{C}_{26}\text{H}_{17}\text{Cl}_3\text{Se}_2$  ( $\text{M}+\text{Na}^+$ ): 593.8726. Found: 593.8738.

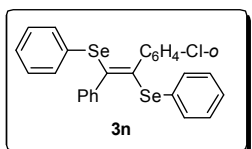

**(E)-(1-(4-chlorophenyl)-2-phenylethene-1,2-diyl)bis(phenylselene) (3n):** Yield: 0.205g (78%). White solid. mp = 115-118 °C.  $^1\text{H}$  RMN ( $\text{CDCl}_3$ , 400 MHz),  $\delta$  (ppm): 7.36-7.15 (m, 10H), 7.12-6.96 (m, 9H).  $^{13}\text{C}$  RMN ( $\text{CDCl}_3$ , 100 MHz),  $\delta$  (ppm): 139.9, 138.8, 136.6, 134.98, 132.8, 132.7, 131.2, 131.1, 129.7, 129.5, 129.3, 128.7, 128.6, 128.4, 128.3, 128.1, 127.8, 127.7, 127.4, 125.9. MS (relative intensity)  $m/z$ : 525 (5), 341 (12), 334 (16), 332 (10), 282 (10), 212 (63), 207 (100), 176 (49), 116 (16), 77 (19). Anal. HRMS calcd. for  $\text{C}_{26}\text{H}_{19}\text{ClSe}_2$  ( $\text{M}+\text{Na}^+$ ): 525.9506. Found: 525.9533.

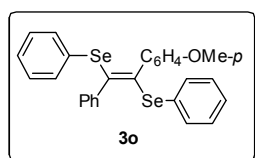

**(E)-(1-(4-methoxyphenyl)-2-phenylethene-1,2-diyl)bis(phenylselenene) (3o):** Yield: 0.188g (72%). Yellow solid. mp = 52-55 °C. <sup>1</sup>H RMN (CDCl<sub>3</sub>, 400 MHz), δ (ppm): 7.28-6.94 (m, 16 H), 6.9-6.84 (m, 1H), 6.76-6.63 (m, 2H). <sup>13</sup>C RMN (CDCl<sub>3</sub>, 100 MHz), δ (ppm): 158.9, 140.8, 135.1, 134.2, 134.0, 133.2, 131.4, 130.9, 130.5, 130.3, 130.17, 128.5, 128.6, 128.3, 127.6, 127.2, 126.2, 113.1, 55.1. MS (relative intensity) *m/z*: 522 (11), 365 (42), 284 (12), 208 (100), 193 (62), 165 (66), 139 (9), 77 (9). Anal. HRMS calcd. for C<sub>27</sub>H<sub>22</sub>OSe<sub>2</sub> (M+Na<sup>+</sup>): 522.0001. Found: 522.0012.

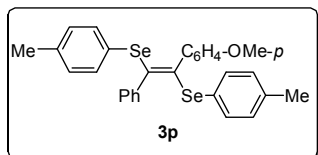

**(Z)-(1-(4-methoxyphenyl)-2-phenylethene-1,2-diyl)bis(p-tolylselenene) (3p):** Yield: 0.173g (63%). Yellow solid. mp = 121-123 °C. <sup>1</sup>H RMN (CDCl<sub>3</sub>, 400 MHz), δ (ppm): 7.24-7.09 (m, 7H), 7.06-7.03 (m, 4H), 6.82-7.78 (m, 4H), 6.719-6.69 (m, 2H), 3.74 (s, 3H), 2.19 (s, 6H). <sup>13</sup>C RMN (CDCl<sub>3</sub>, 50 MHz), δ (ppm): 158.6, 140.8, 137.3, 137.1, 135.2, 137.7, 133.2, 132.5, 130.8, 129.5, 129.2, 129.1, 127.5, 127.2, 126.7, 126.4, 113.0, 55.1, 21.1. MS (relative intensity) *m/z*: 550 (14), 348 (13), 379 (52), 364 (9), 298 (17), 208 (100), 193 (78), 165 (79), 139 (10), 91 (35). Anal. (%) calcd. for C<sub>29</sub>H<sub>26</sub>OSe<sub>2</sub>: C 63.51, H 4.78. Found: C 63.74, H 4.82.

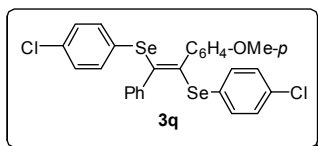

**(E)-(1-(4-methoxyphenyl)-2-phenylethene-1,2-diyl)bis(4-chlorophenylselenene) (3q):** Yield: 0.224g (76%). Yellow solid. mp = 80-86 °C. <sup>1</sup>H RMN (CDCl<sub>3</sub>, 400 MHz), δ (ppm): 7.25-7.05 (m, 10H), 7.03-6.92 (m, 4H), 6.83-6.81 (m, 1H), 6.76-6.68 (m, 2H), 3.73 (s, 3H). <sup>13</sup>C RMN (CDCl<sub>3</sub>, 50 MHz), δ (ppm): 159.0, 141.3, 140.0, 136.3, 136.2, 133.9, 133.8, 129.3, 128.9, 128.5(2C), 128.1, 128.0, 127.8, 127.7, 121.9, 114.8, 113.5, 55.2. MS (relative intensity) *m/z*: 591 (4), 401 (13), 399 (29), 364 (19), 208 (100), 193 (60), 165 (64), 139 (9), 73 (11). Anal. HRMS calcd. for C<sub>27</sub>H<sub>20</sub>Cl<sub>2</sub>OSe<sub>2</sub> (M+Na<sup>+</sup>): 589.9222. Found: 589.9230.

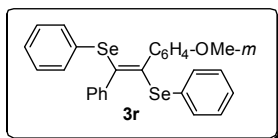

**(E)-(1-(3-methoxyphenyl)-2-phenylethene-1,2-diyl)bis(phenylselenene) (3r):** Yield: 0.162g (62%). White solid. mp = 112-115 °C. RMN <sup>1</sup>H (CDCl<sub>3</sub>, 400 MHz), δ (ppm): 7.24- 6.97 (m, 16H), 6.87-6.85 (m, 1H), 6.72 (s, 1H), 6.68-6.65 (m, 1H), 3.69 (s, 3H). RMN <sup>13</sup>C (CDCl<sub>3</sub>, 100 MHz), δ (ppm): 158.9, 141.8, 140.5, 135.1, 134.3, 134.0, 128.7, 127.5, 127.4 (2C), 122.0, 114.7, 113.6, 55.2. MS (relative intensity) *m/z*: 522 (23), 520 (21), 350 (13), 313 (10), 285 (19), 253 (17), 208 (100), 178 (73), 165 (65), 152 (14), 77 (23). Anal. HRMS calcd. for C<sub>27</sub>H<sub>22</sub>OSe<sub>2</sub>: C 62.32, H 4.26. Found: C 62.45, H 4.30.

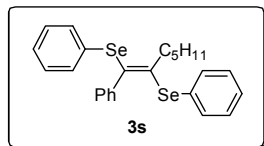

**(E)-(1-phenylhept-1-ene-1,2-diyl)bis(phenylselenene) (3s):** Yield: 0.206g (85%). Yellow oil. <sup>1</sup>H RMN (CDCl<sub>3</sub>, 400 MHz), δ (ppm): 7.48-7.45 (m, 2H), 7.29-7.23 (m, 5H), 7.13-7.05 (m, 8H), 2.64 (t, *J* = 7.8 Hz, 2H), 1.57 (qui, *J* = 7.6 Hz, 2H), 1.27-1.19 (m, 4H), 0.85 (t, *J* = 6.6 Hz, 3H). <sup>13</sup>C RMN (CDCl<sub>3</sub>, 100 MHz), δ (ppm): 141.8, 137.3, 134.6, 134.2, 131.3, 130.5, 130.3, 129.5, 129.9, 128.6, 127.6, 127.5, 127.2, 127.1, 37.7, 31.3, 29.0, 22.4, 13.9. MS (relative intensity) *m/z*: 488 (4), 486 (13), 258 (35), 207(17), 178 (100), 156 (17), 143 (40), 129 (48), 115

(78), 91 (64), 71 (22), 65 (6), 55 (7), 51 (6). Anal. HRMS calcd. for  $C_{25}H_{26}Se_2$ : C 486.0365. Found: 486.0378.

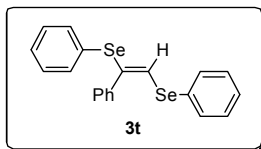

**(E)-(1-phenylethene-1,2-diyl)bis(phenylselenene) (3t):** Yield: 0.124g (60%). Yellow oil.  $^1H$  RMN ( $CDCl_3$ , 400 MHz),  $\delta$  (ppm): 7.55-7.14 (m, 15H), 7.07 (s, 1H).  $^{13}C$  RMN ( $CDCl_3$ , 50 MHz),  $\delta$  (ppm): 139.5, 133.0, 132.1, 131.1, 130.6, 130.4, 129.3, 129.2, 128.6, 128.3, 128.4, 127.5, 127.4, 126.0. MS (relative intensity)  $m/z$ : 415 (9), 280 (10), 258 (19), 252 (9), 206 (25), 178 (100), 156 (48), 151 (10), 77 (66). Anal. HRMS calcd. for  $C_{20}H_{16}Se_2$ : C 415.9582. Found: 415.9602.

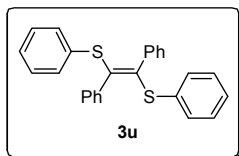

**(E)-1,2-diphenyl-1,2-bis(phenylthio)ethene (3u):** Yield: 0.123g (62%). White solid. mp = 106-106 °C.  $^1H$  RMN ( $CDCl_3$ , 400 MHz),  $\delta$  (ppm): 7.49-7.37 (m, 3H), 7.19-6.99 (m, 16H), 7.00-6.89 (m, 1H).  $^{13}C$  RMN ( $CDCl_3$ , 100 MHz),  $\delta$  (ppm): 138.9, 134.4, 131.7, 130.6, 129.9, 128.1, 128.3, 127.3, 126.8. MS (relative intensity)  $m/z$ : 396 (49), 287 (30), 271 (13), 253 (41), 209 (51), 206 (56), 178 (100), 165 (43), 152 (42), 108 (29), 77 (18). Anal. HRMS calcd. for  $C_{26}H_{20}S_2$  ( $M+Na^+$ ): 396.1006. Found: 396.1019.

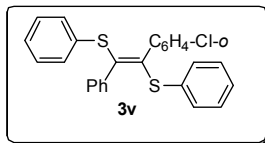

**(E)-(1-(2-chlorophenyl)-2-phenylethene-1,2-diyl)bis(phenylsulfide) (3v):** Yield: 0.091g (42%). White solid. mp = 43-46 °C.  $^1H$  RMN ( $CDCl_3$ , 400 MHz),  $\delta$  (ppm): 7.54-6.99 (m, 19H).  $^{13}C$  RMN ( $CDCl_3$ , 100 MHz),  $\delta$  (ppm): 137.6, 137.0, 134.7, 134.2, 133.3, 132.5, 132.0, 131.5, 130.1, 129.6, 129.3, 129.0, 128.8, 128.3 (2C), 127.8, 127.7, 127.1, 126.0. MS (intensidade relativa)  $m/z$ : 430 (3), 341 (5), 281 (21), 253 (17), 207 (100), 190 (16), 133 (17), 96 (15), 73 (26). Anal. HRMS calcd. for  $C_{26}H_{19}ClS_2$ : 430.0617. Found: 430.0629.

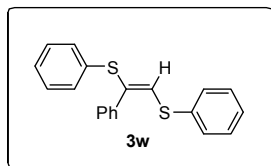

**(E)-(1-phenylethene-1,2-diyl)bis(phenylsulfide) (3w):** Yield: 0.064g (40%). colorless oil.  $^1H$  RMN ( $CDCl_3$ , 400 MHz),  $\delta$  (ppm): 7.60-7.56 (m, 2 H), 7.34-7.17 (m, 15 H), 7.14-7.09 (m, 1H), 6.89 (s, 1H).  $^{13}C$  RMN ( $CDCl_3$ , 50 MHz),  $\delta$  (ppm): 138.9, 137.4, 134.4, 134.2, 131.7, 131.5, 130.6, 129.9, 128.5, 128.3, 127.6 (2C), 127.3, 126.7. MS (relative intensity)  $m/z$ : 331 (4), 281 (12), 253 (15), 209 (13), 207 (100), 191 (13), 123 (14), 96 (14), 73 (7). Anal.

### SELECTED SPETRA

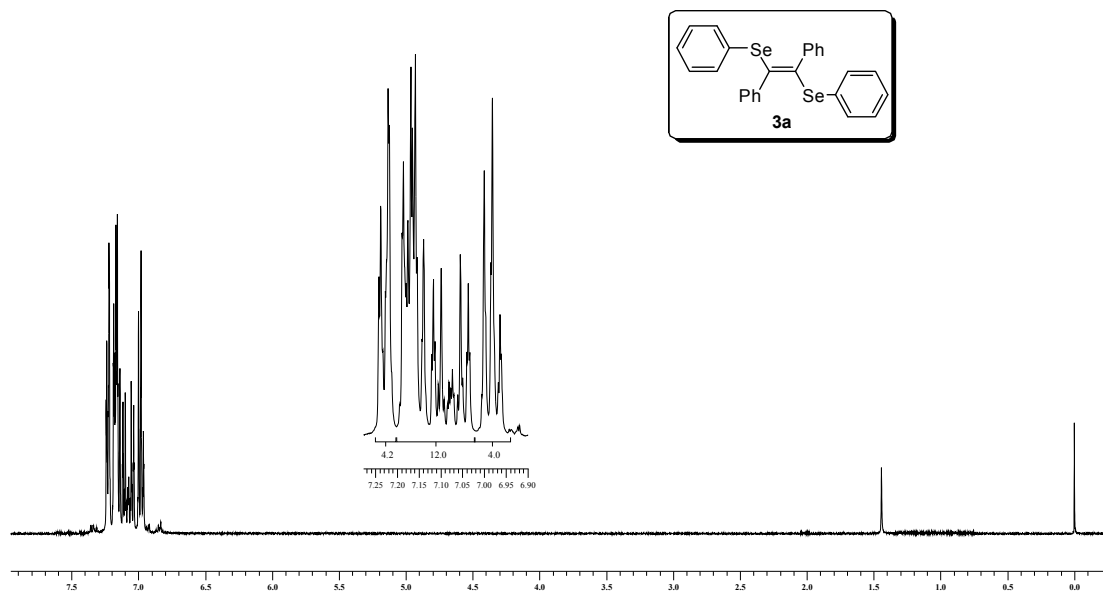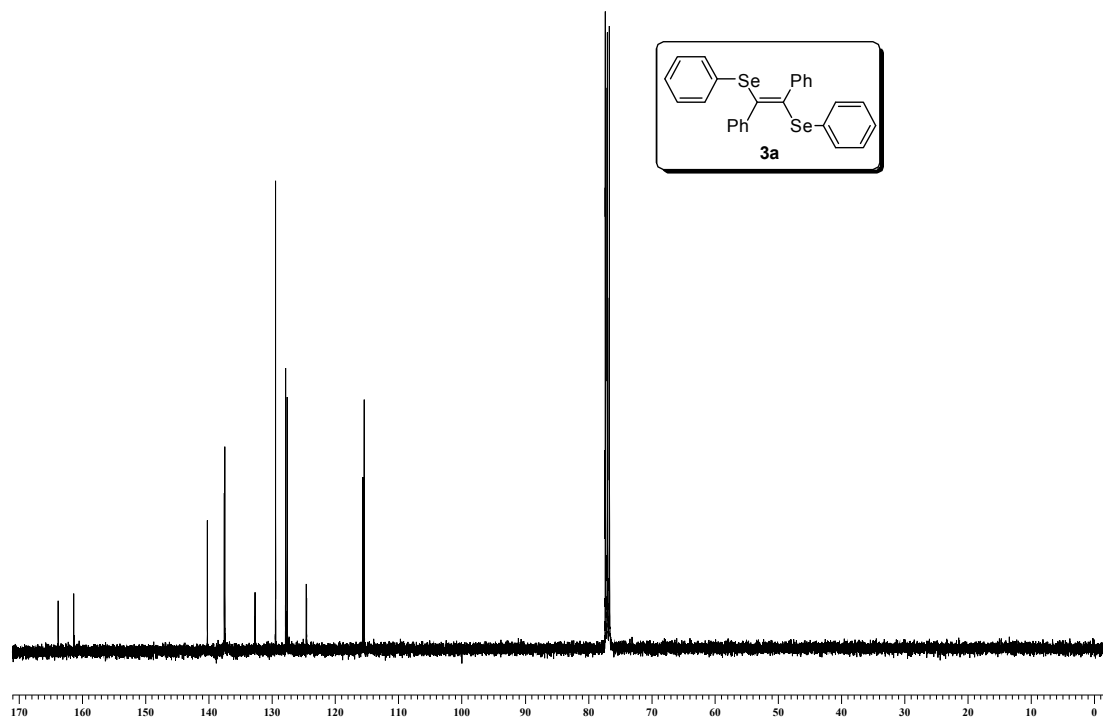



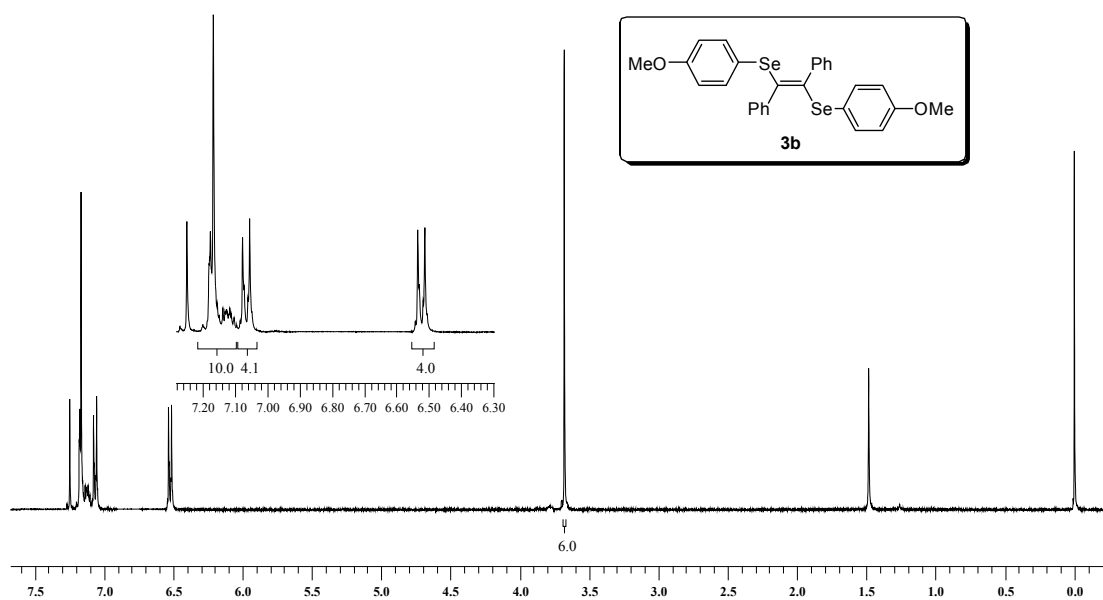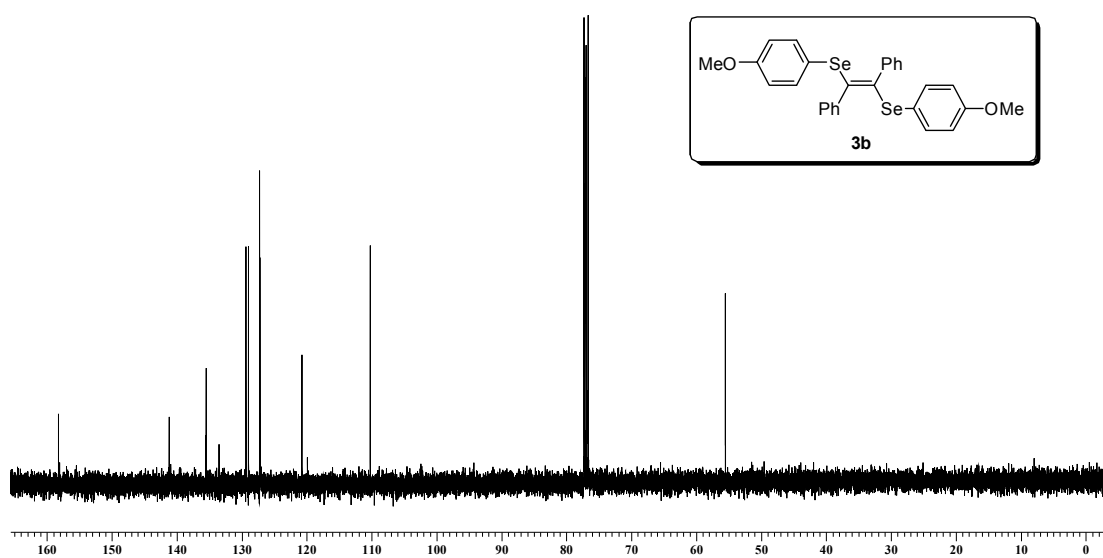

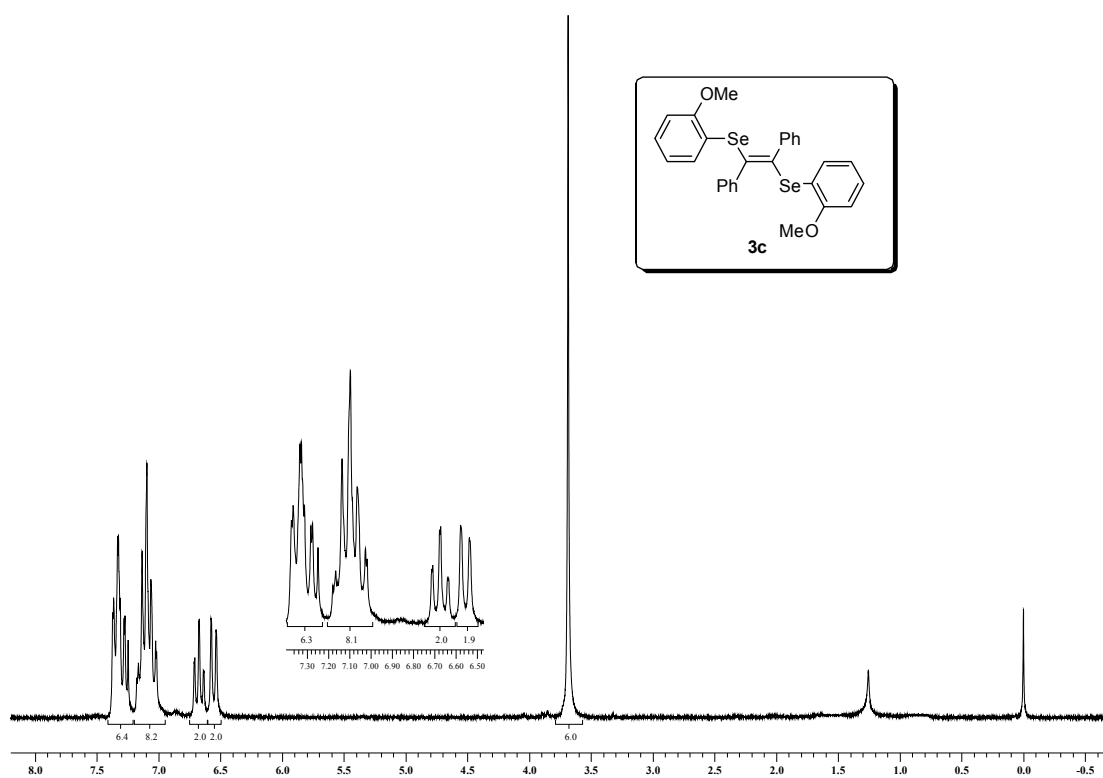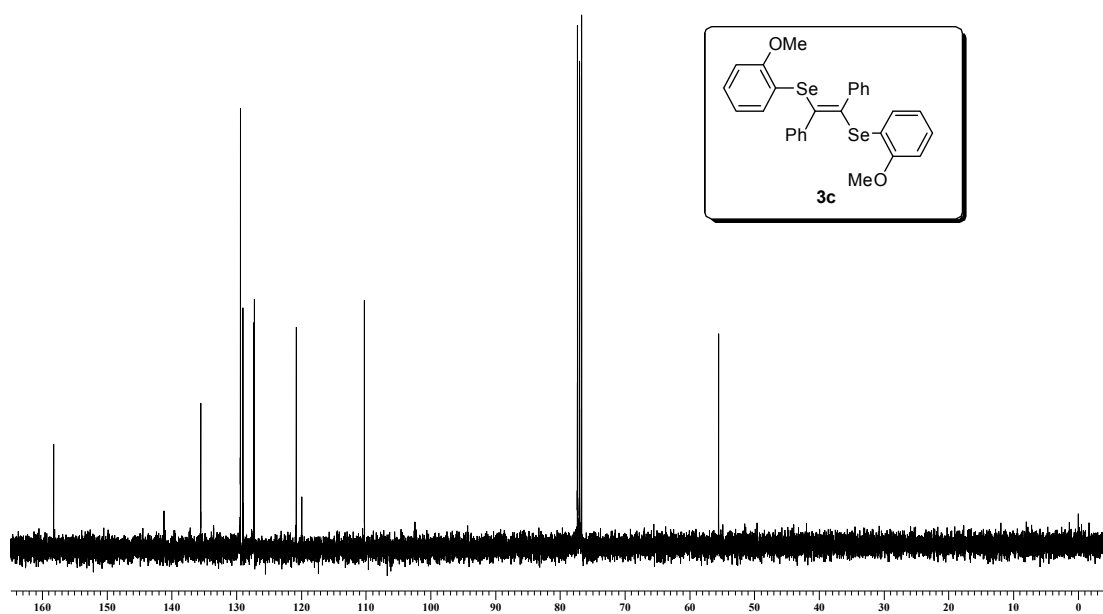

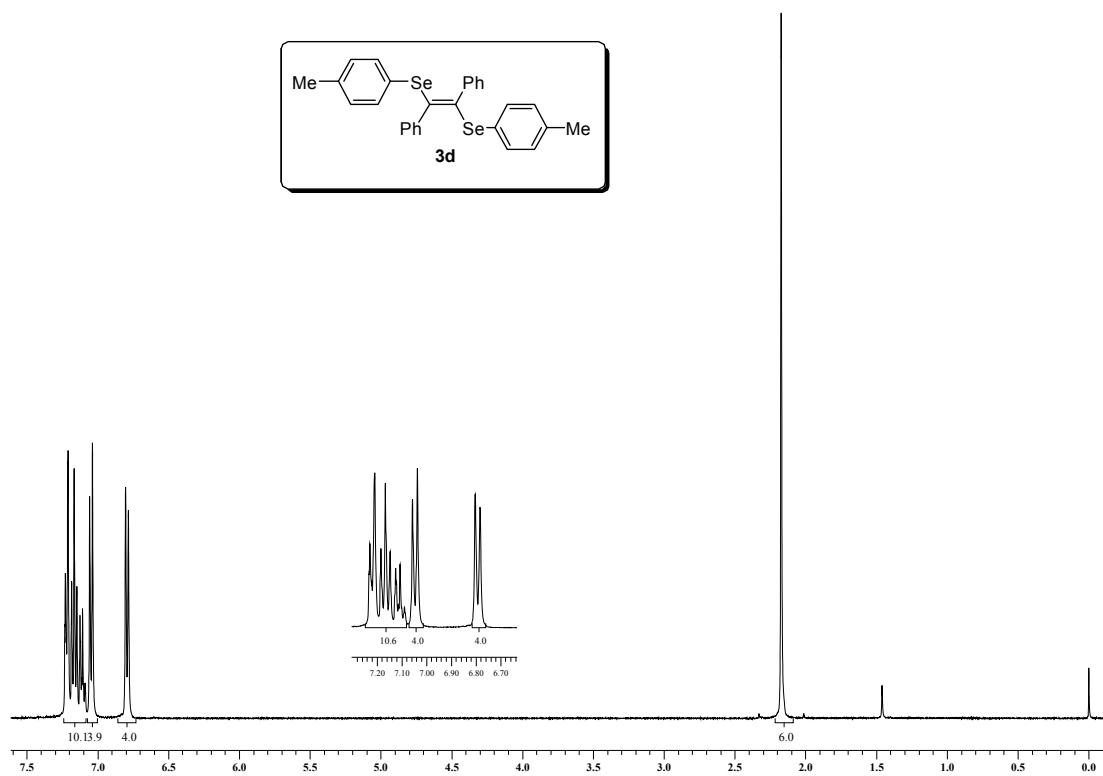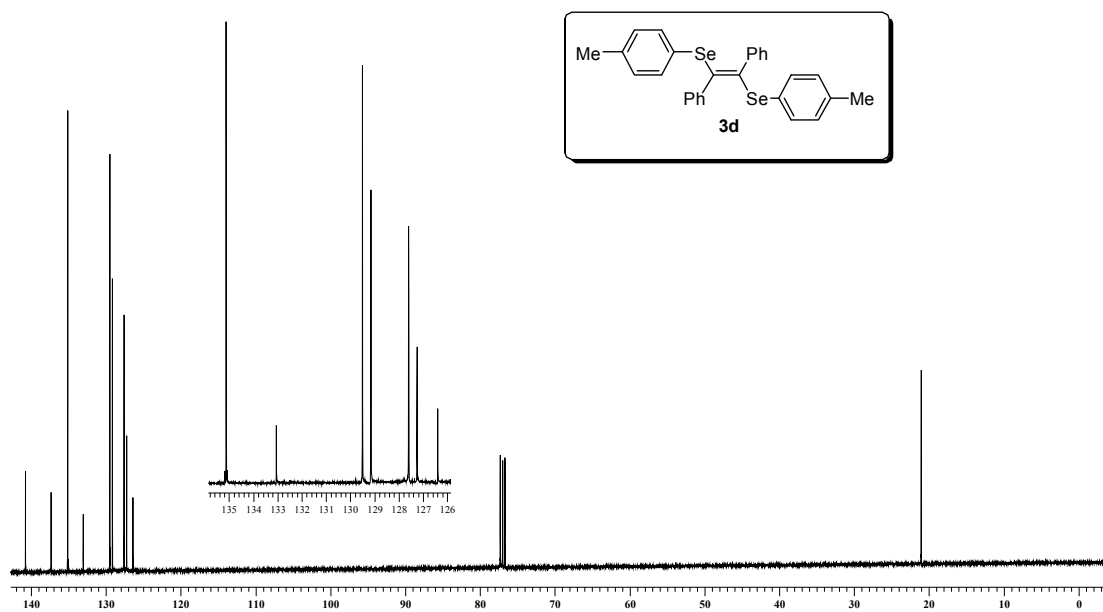

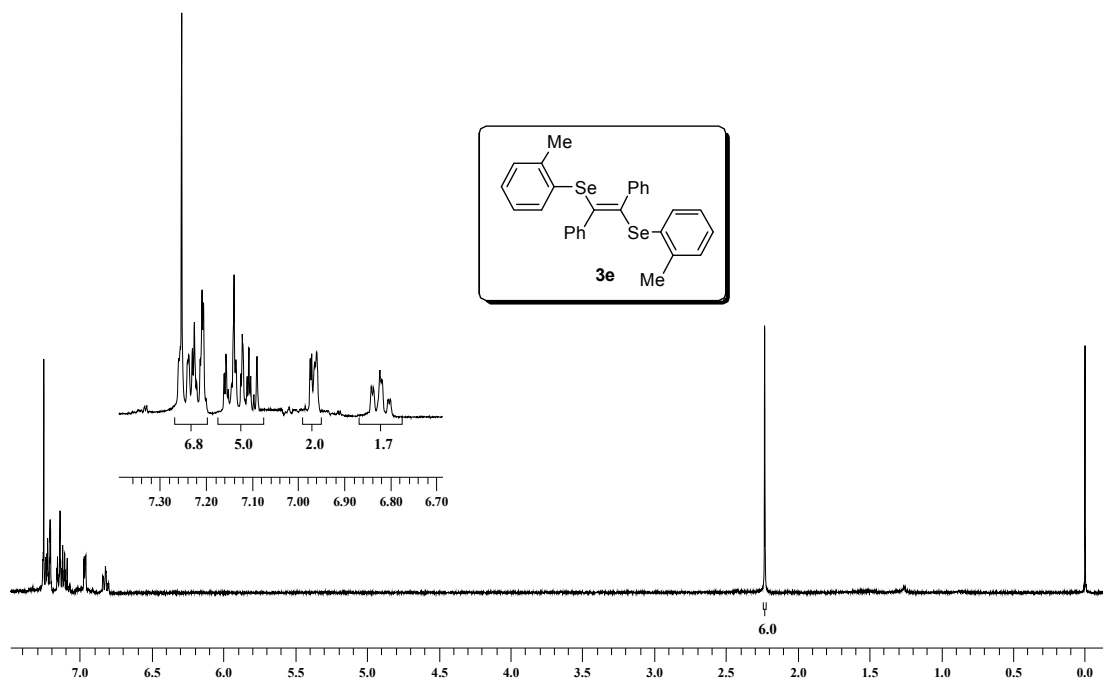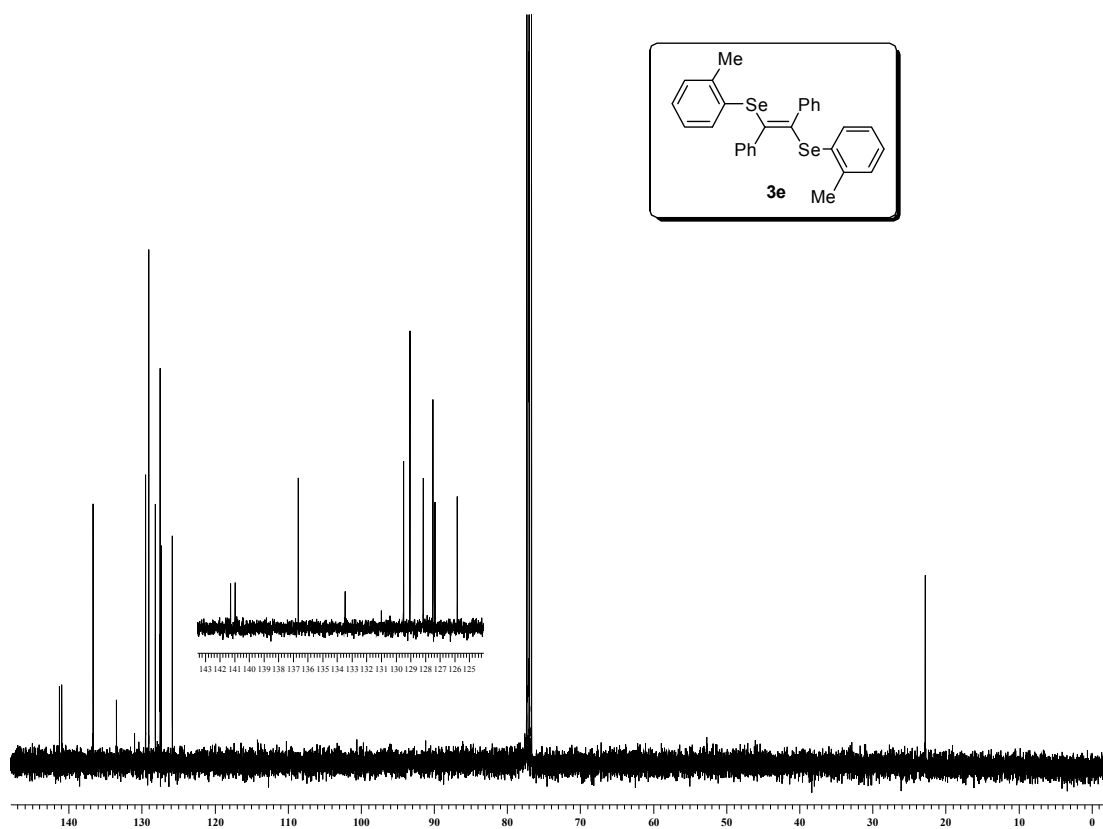

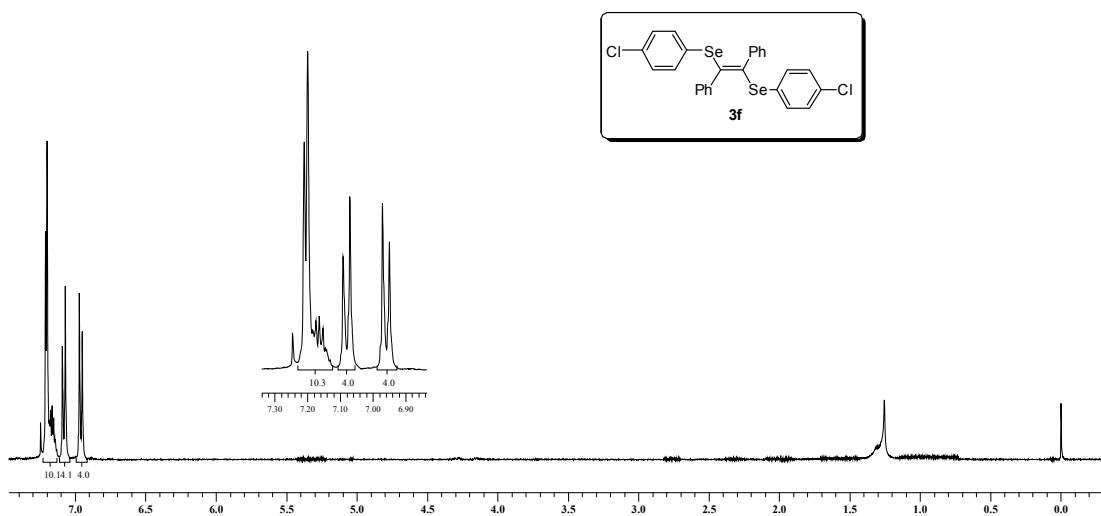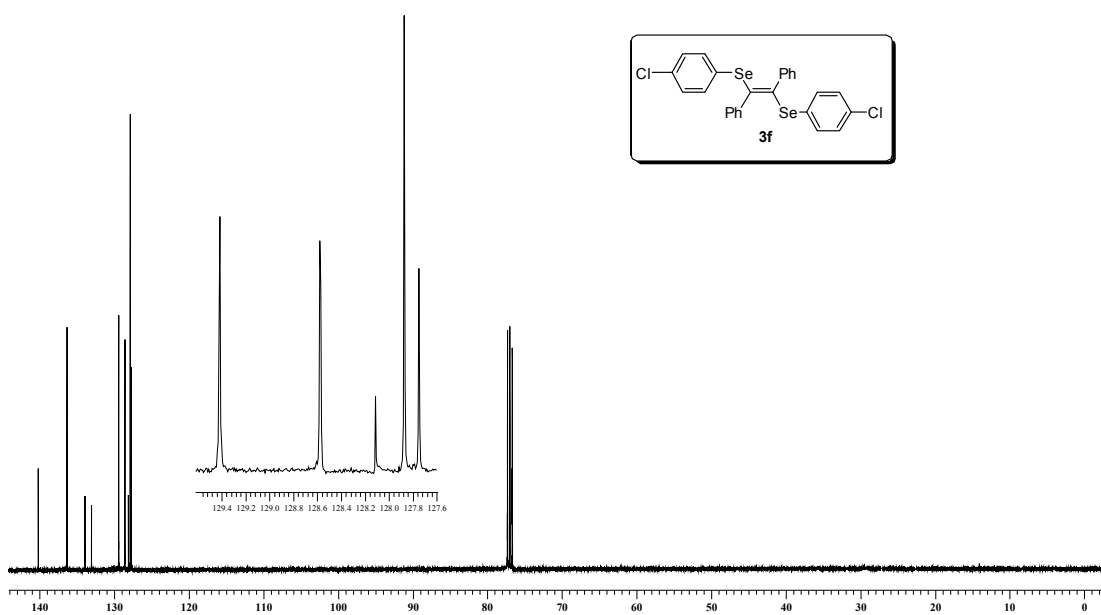

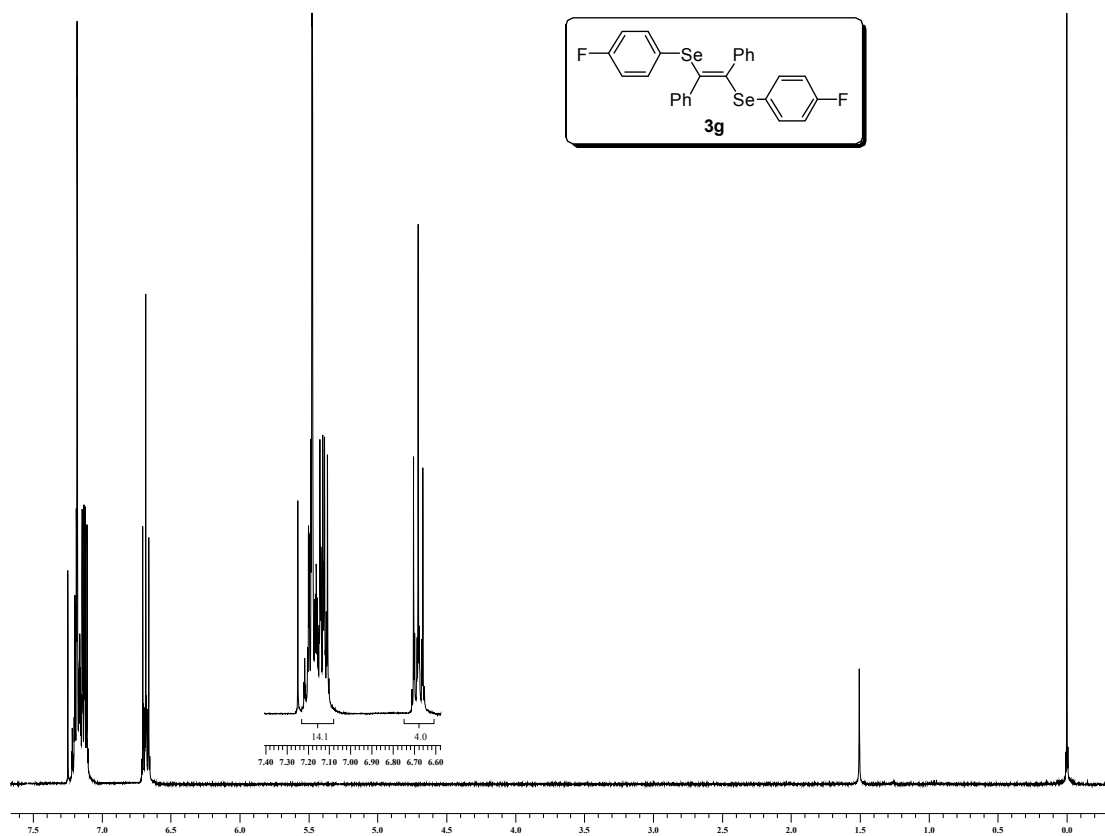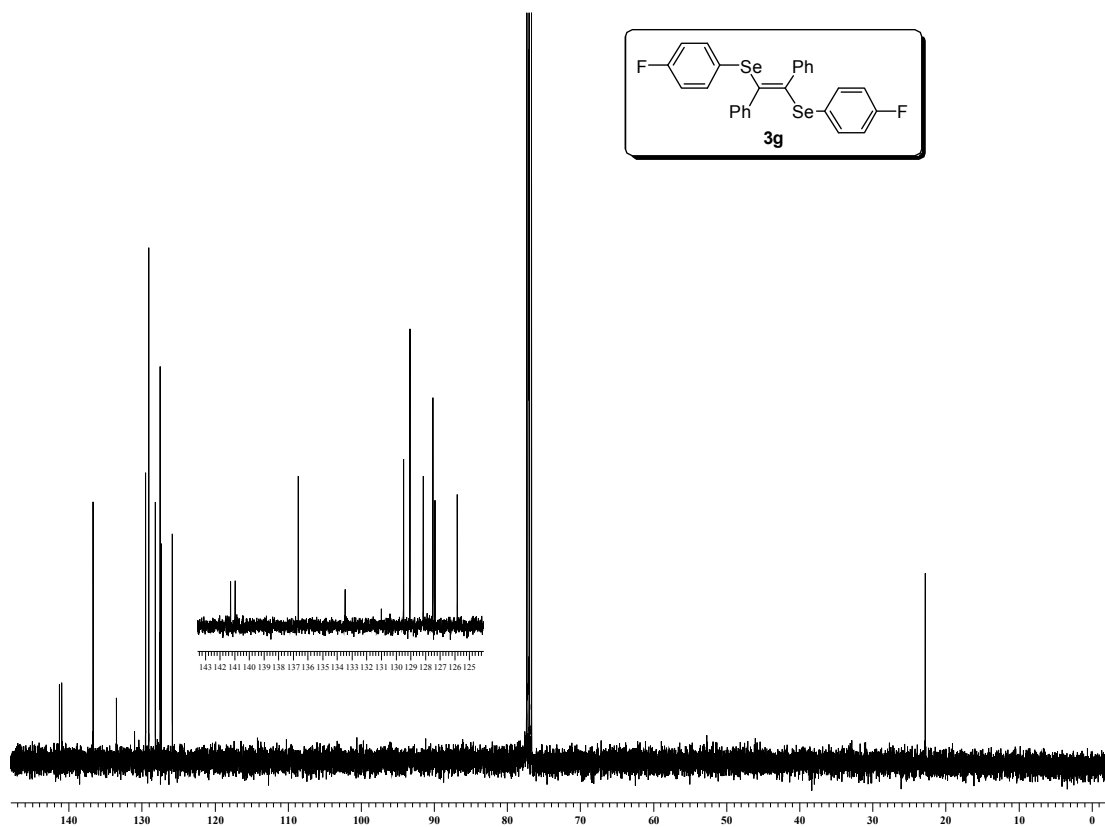

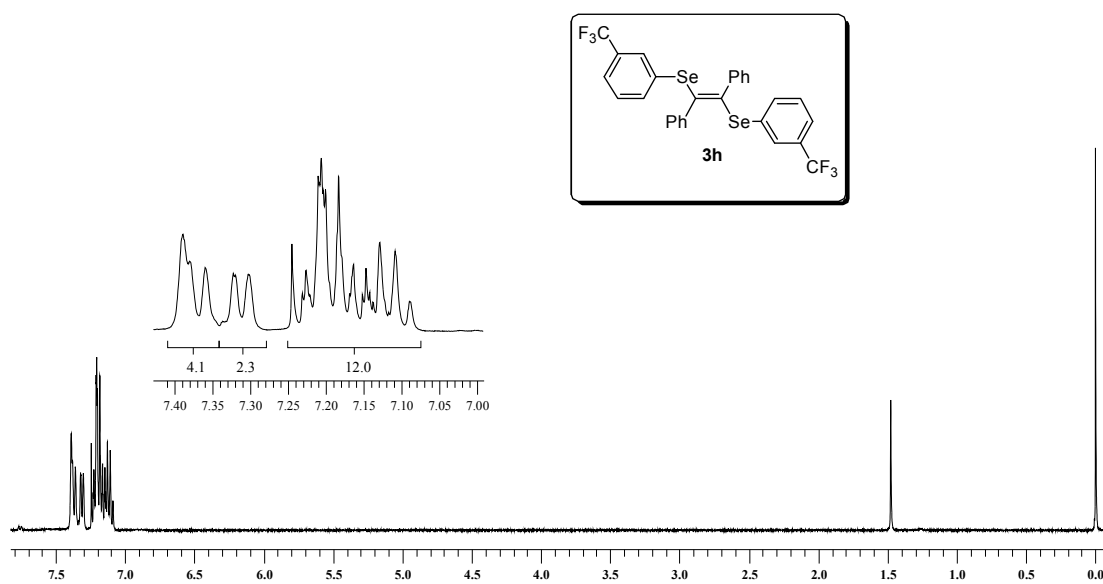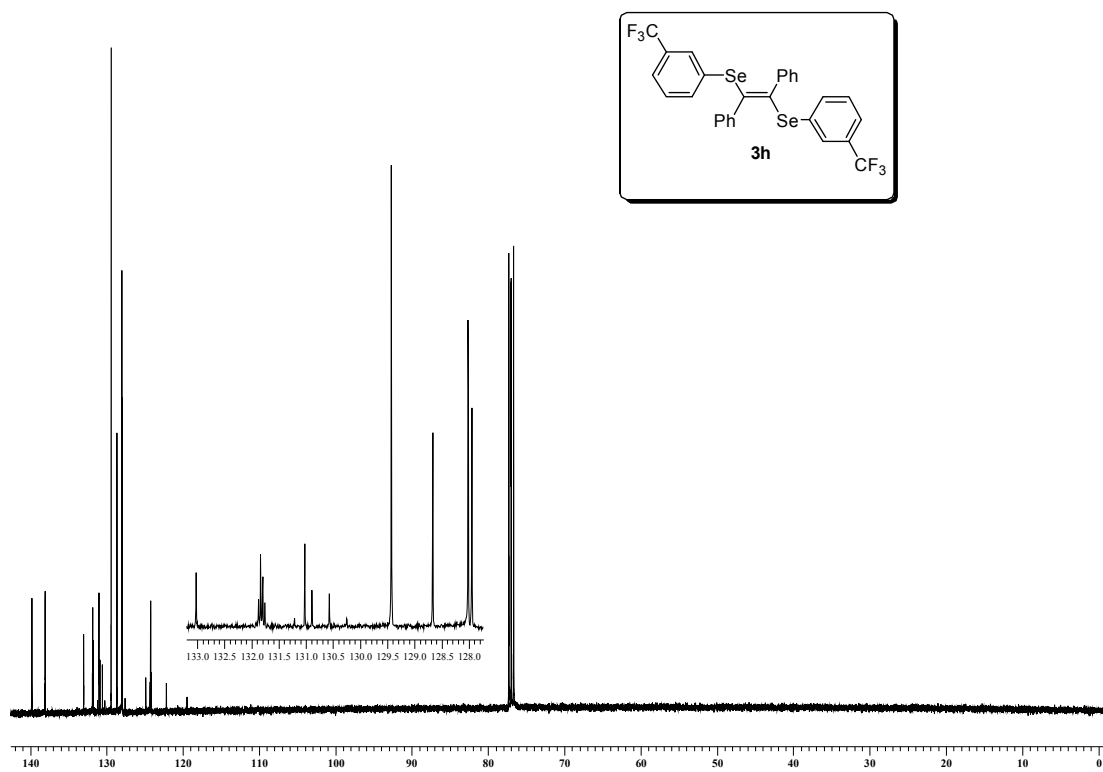

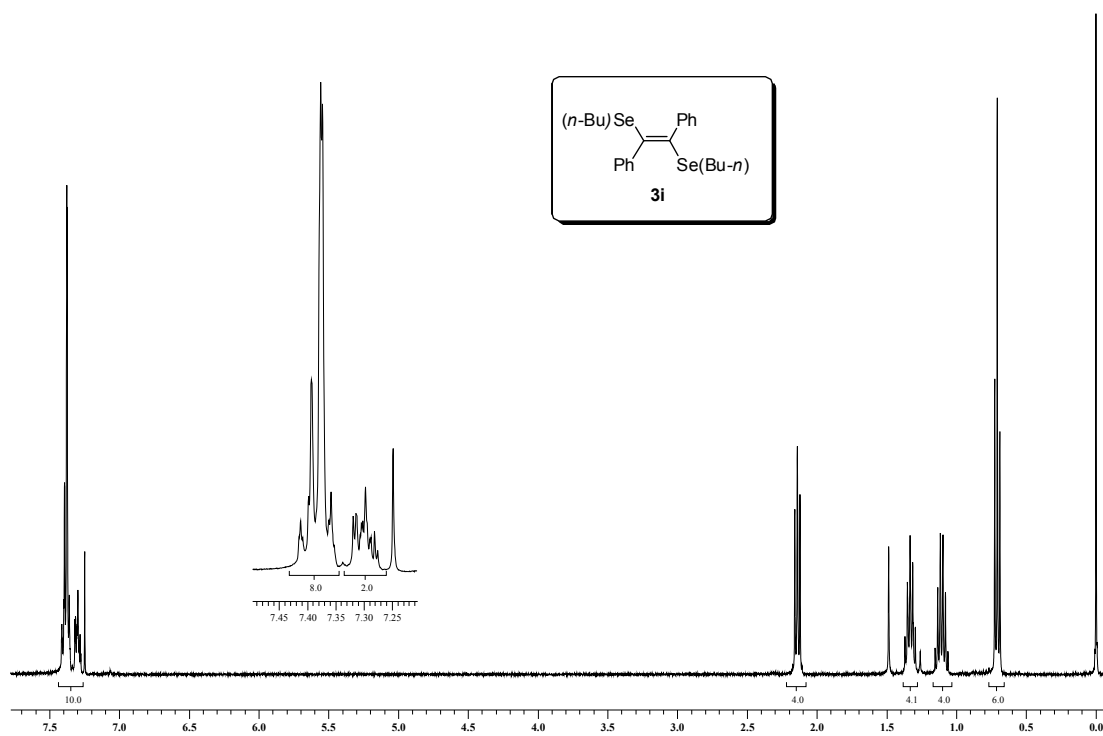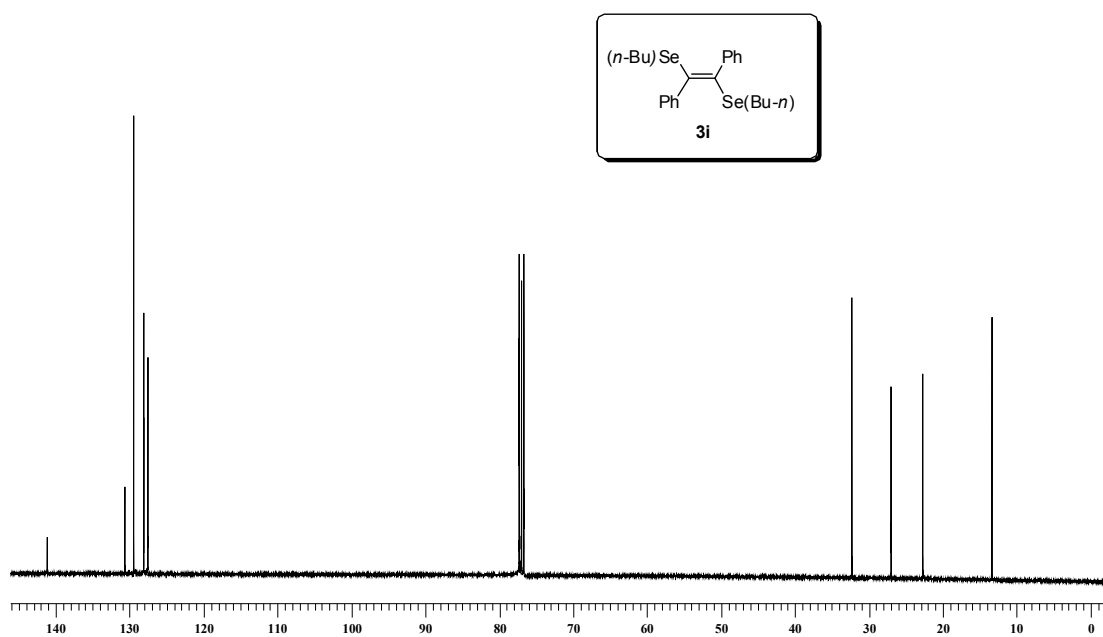



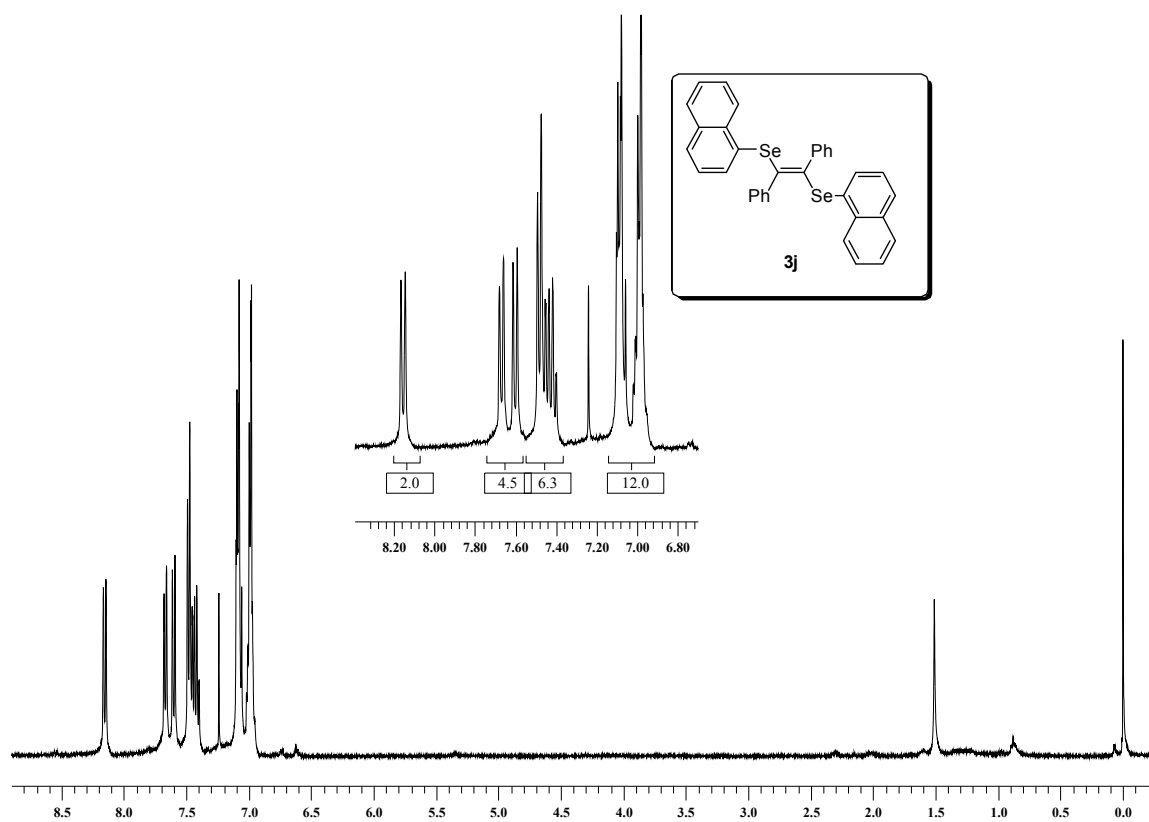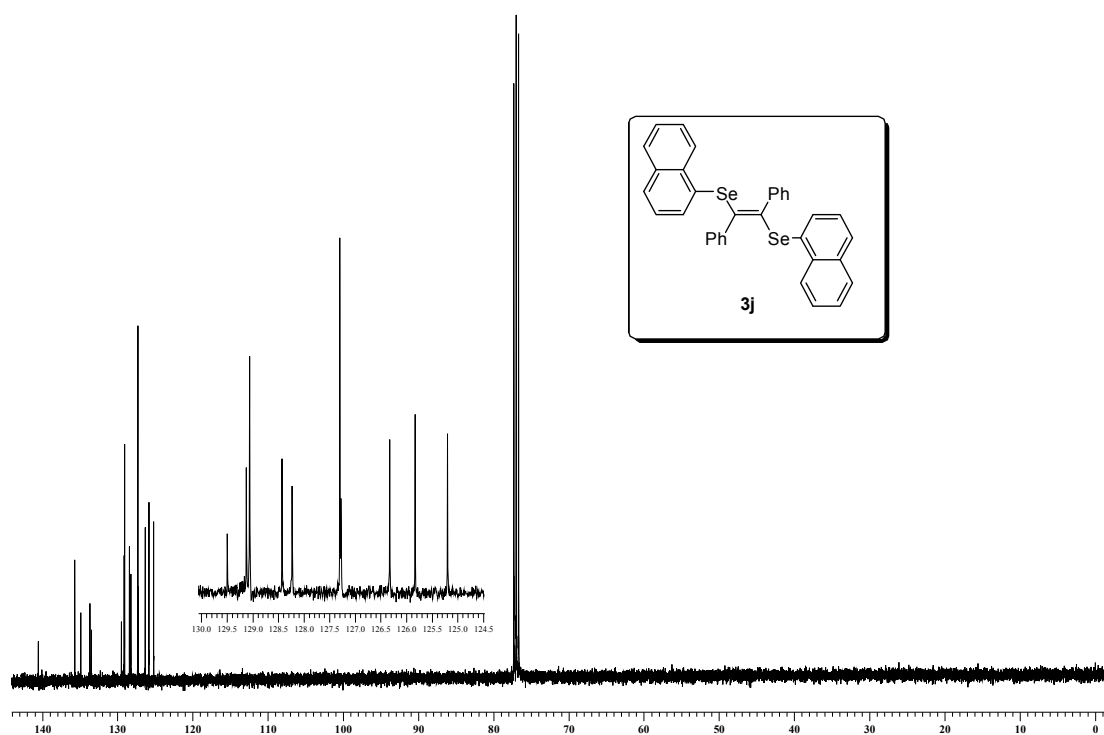

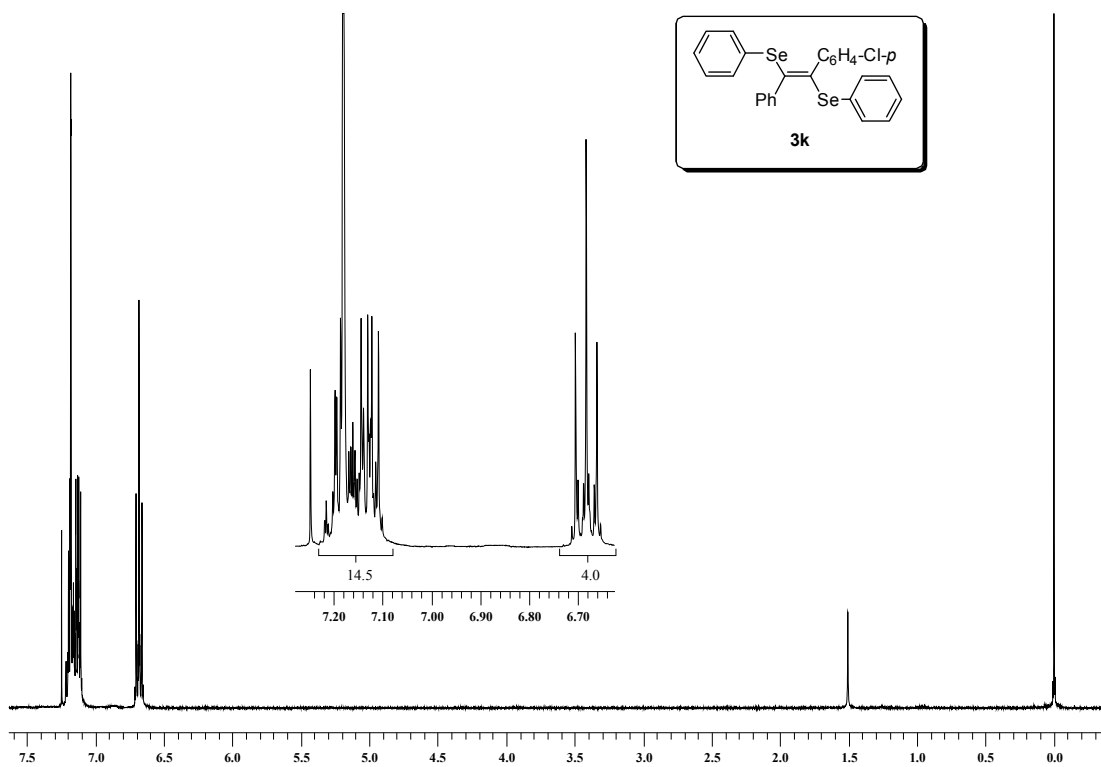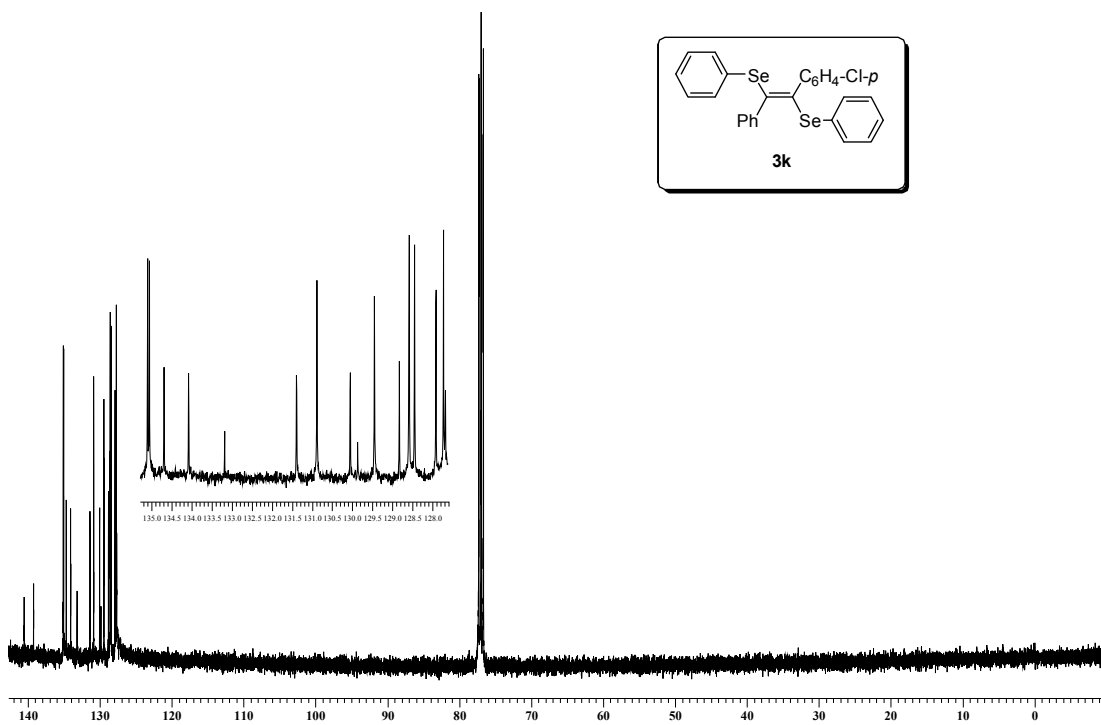

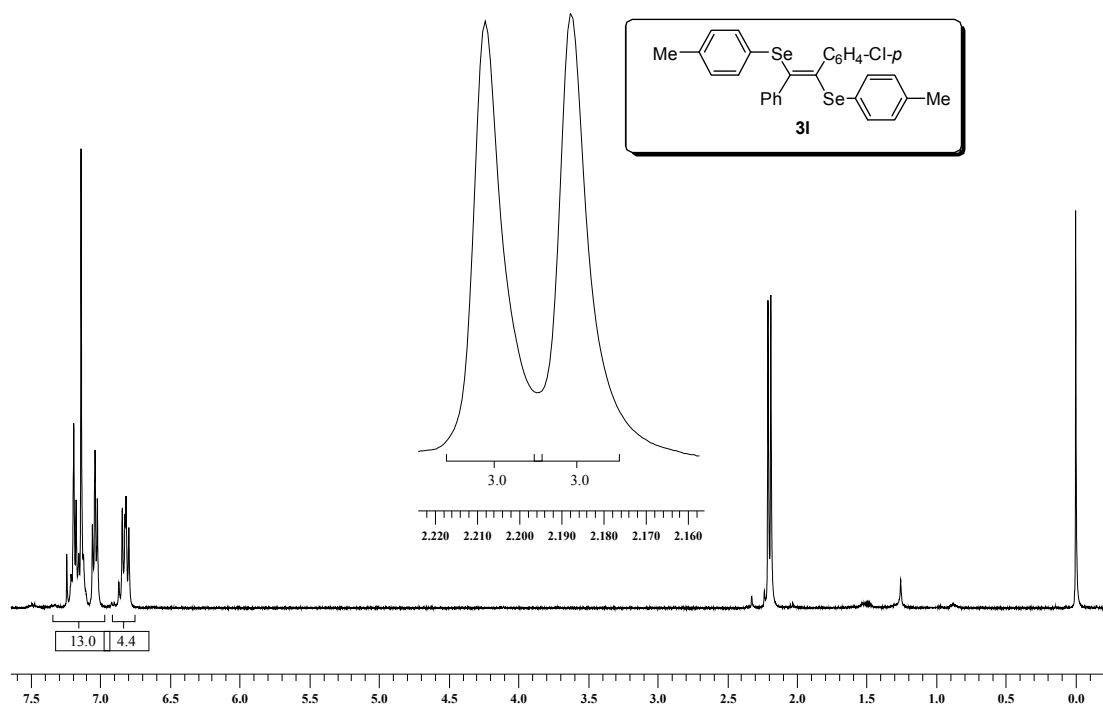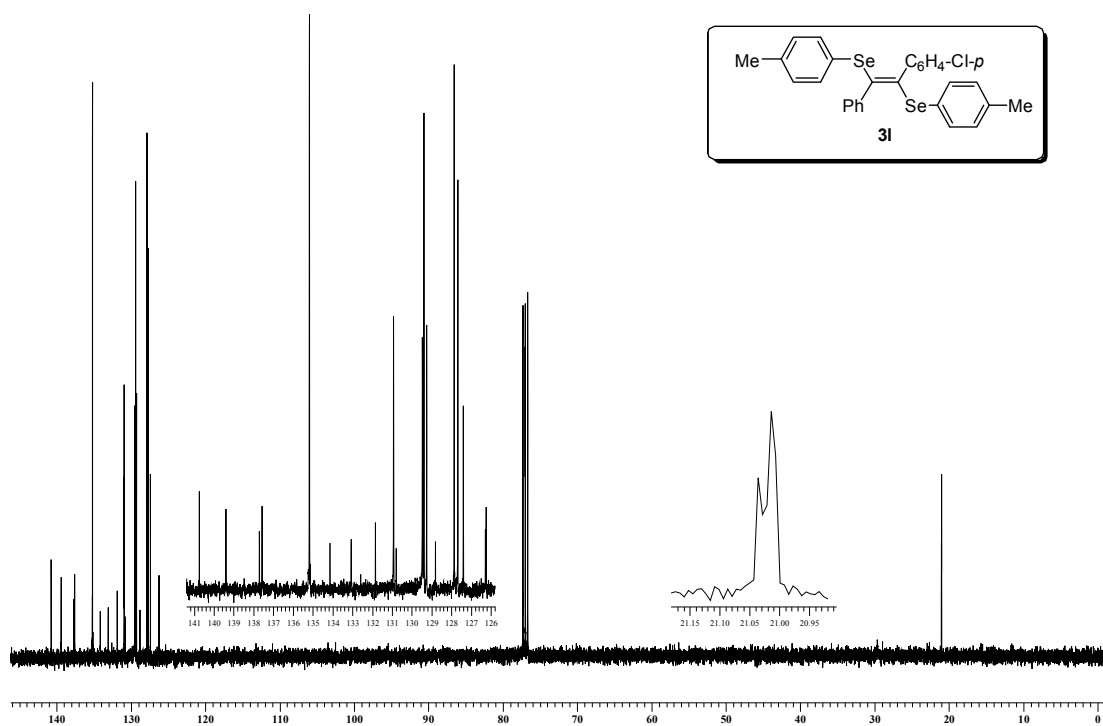

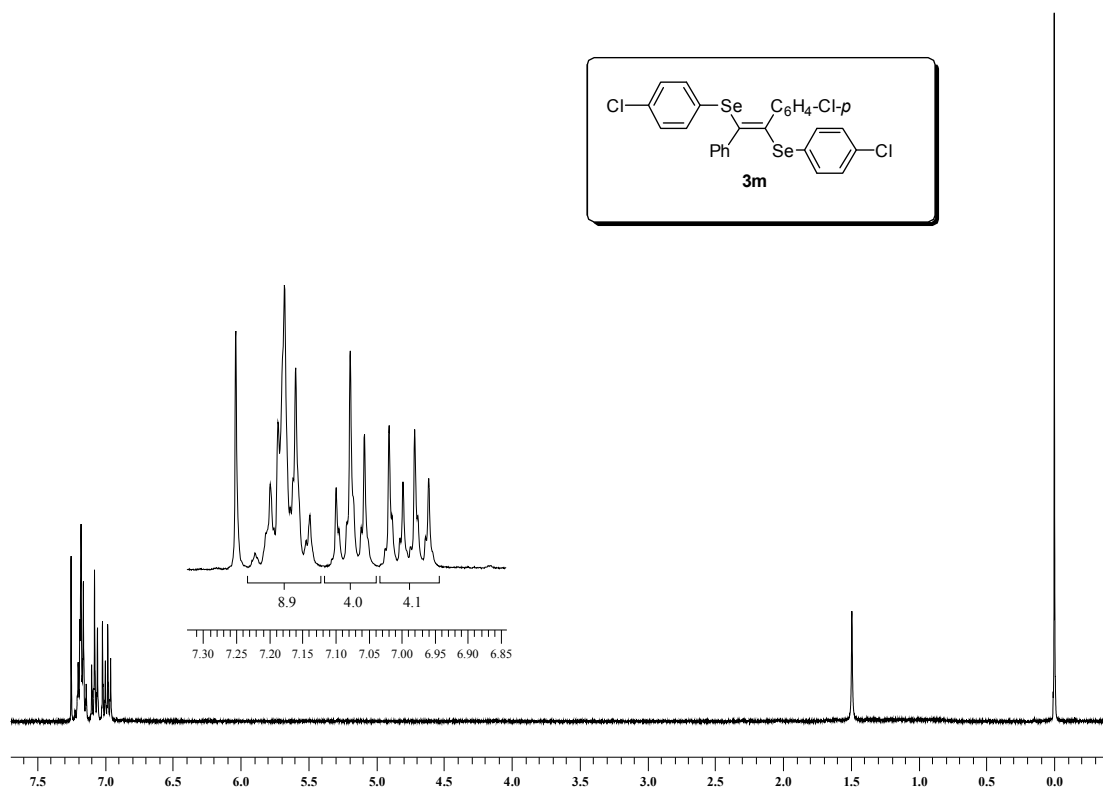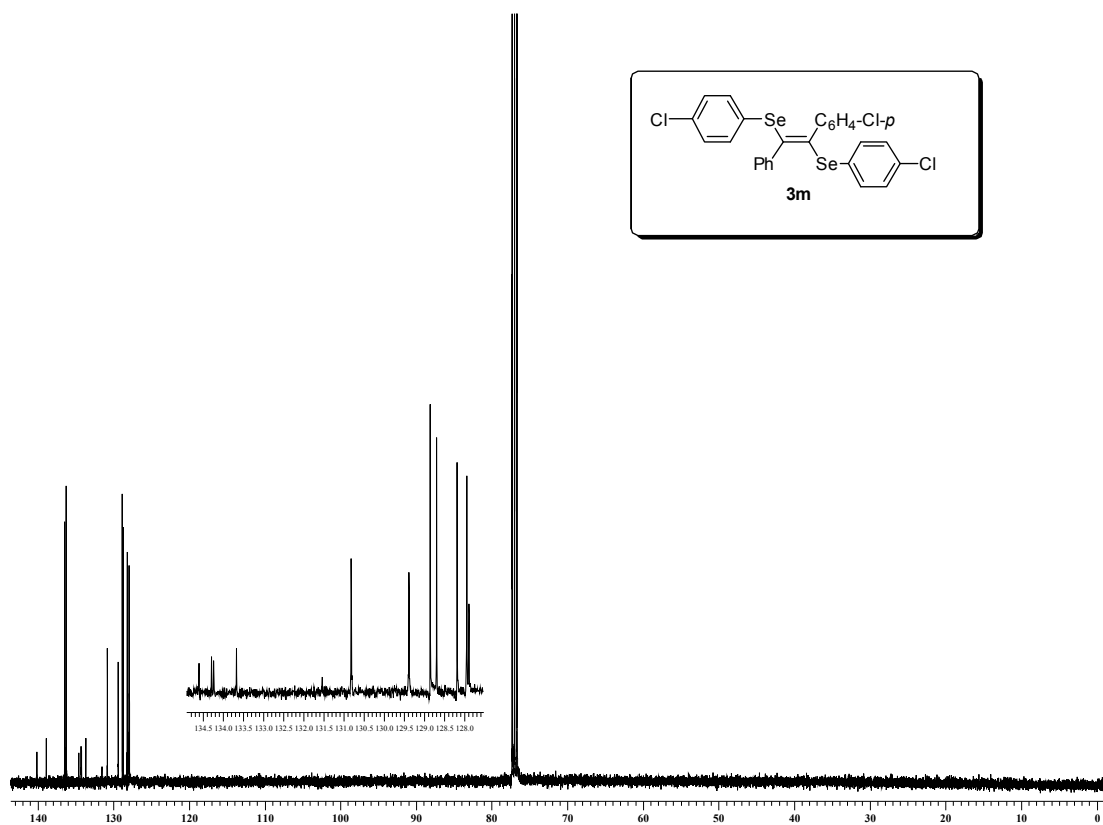

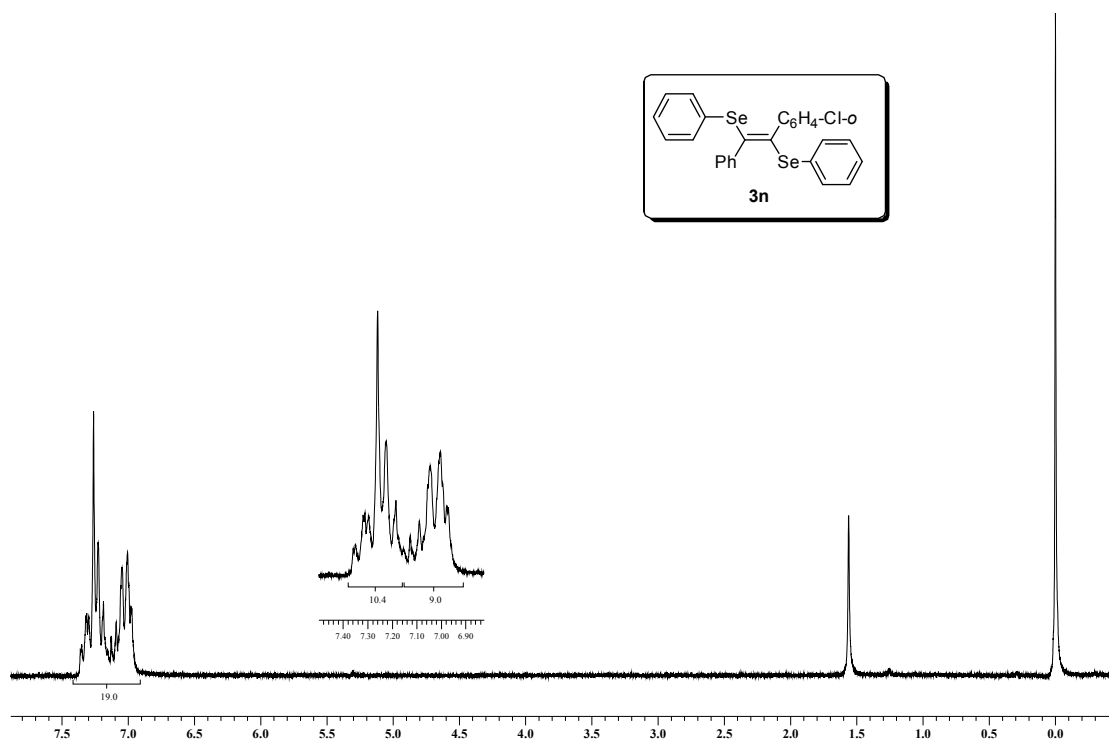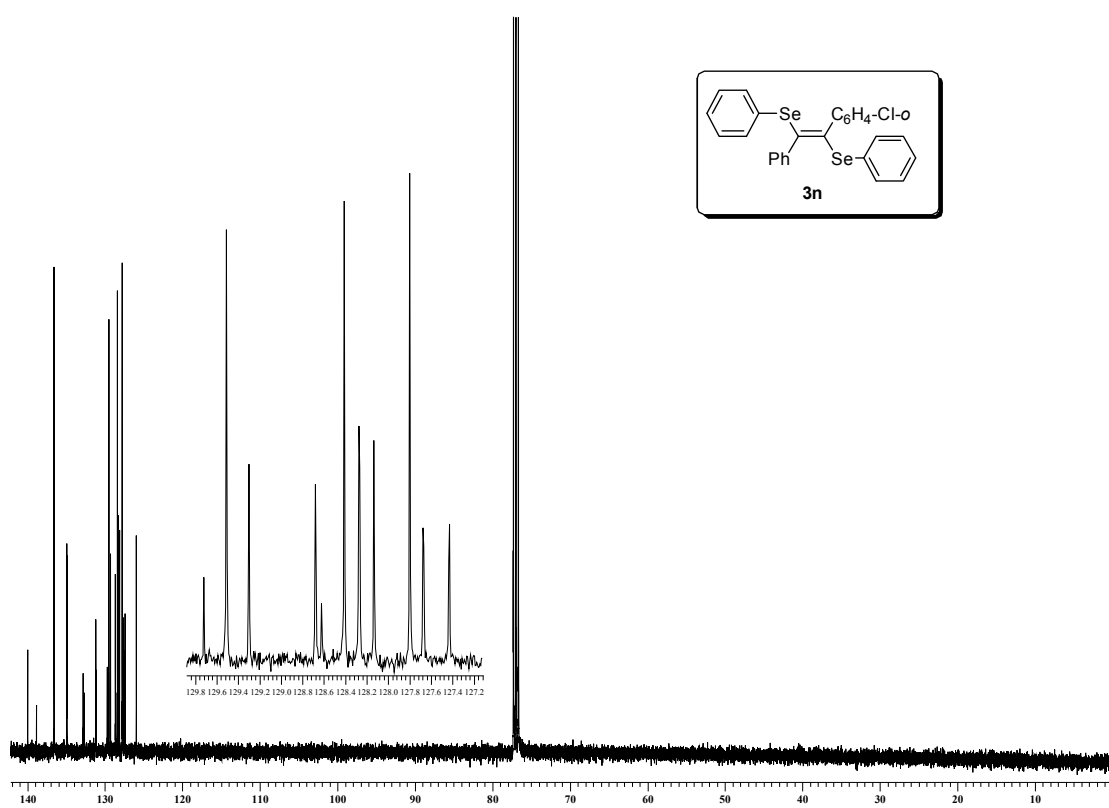

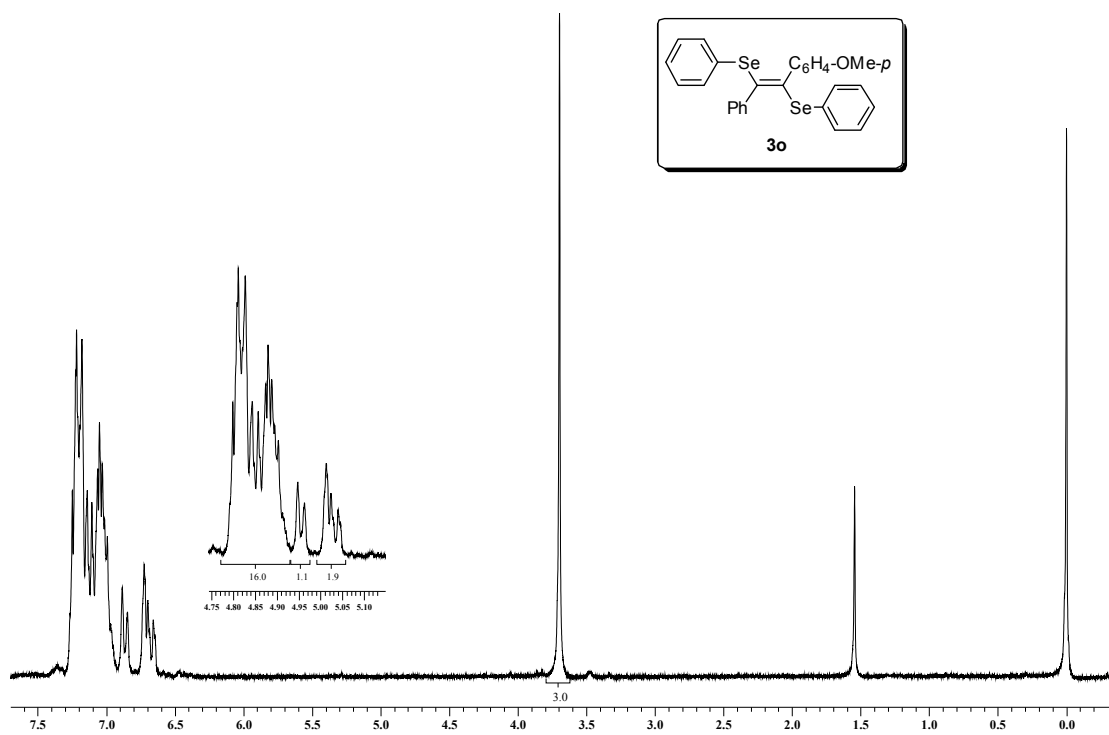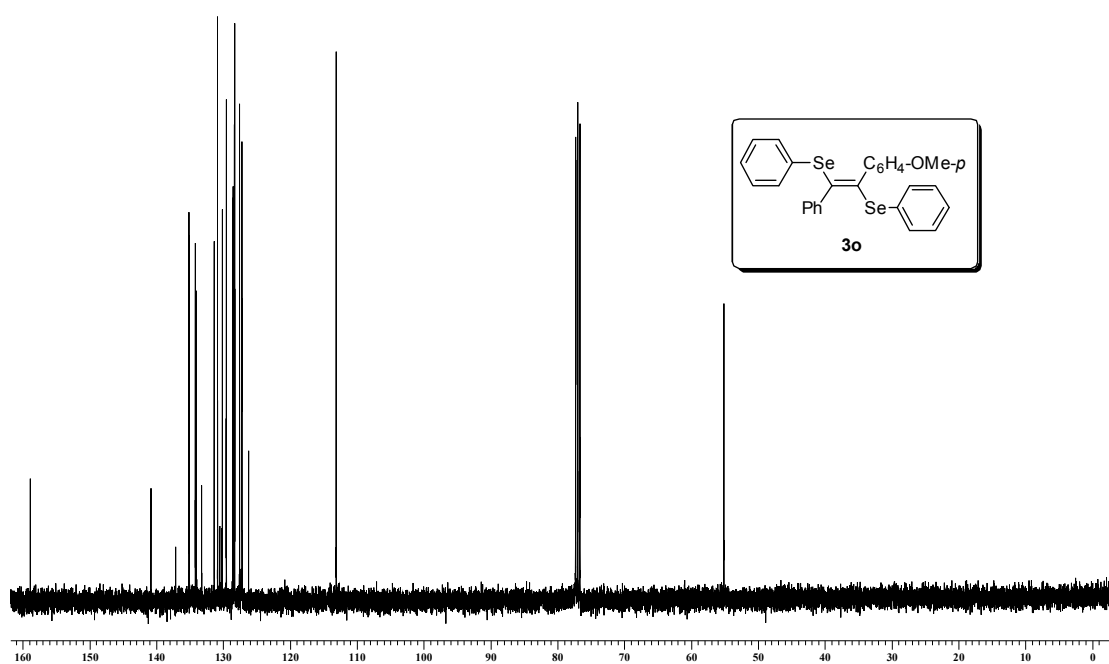

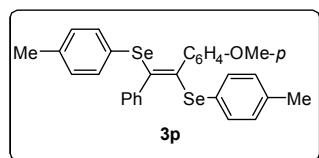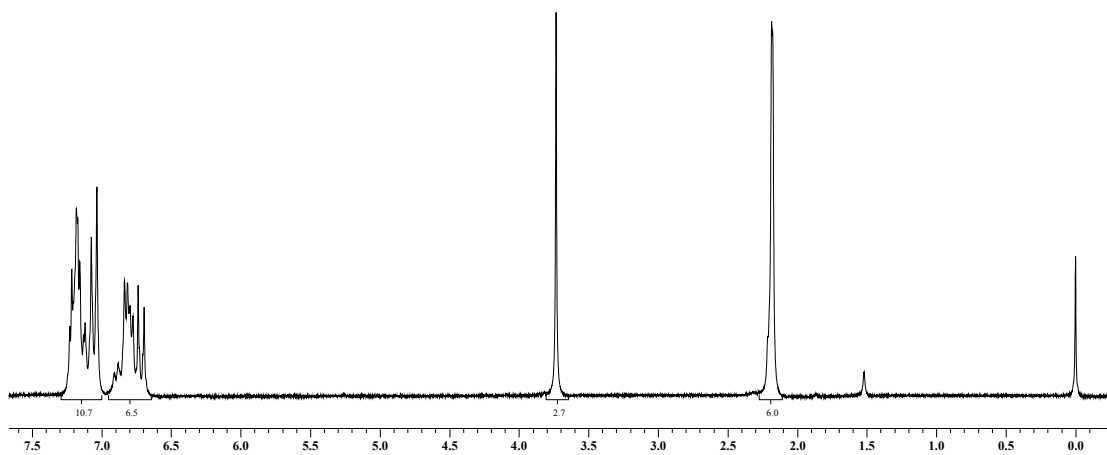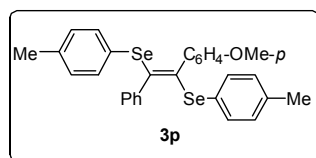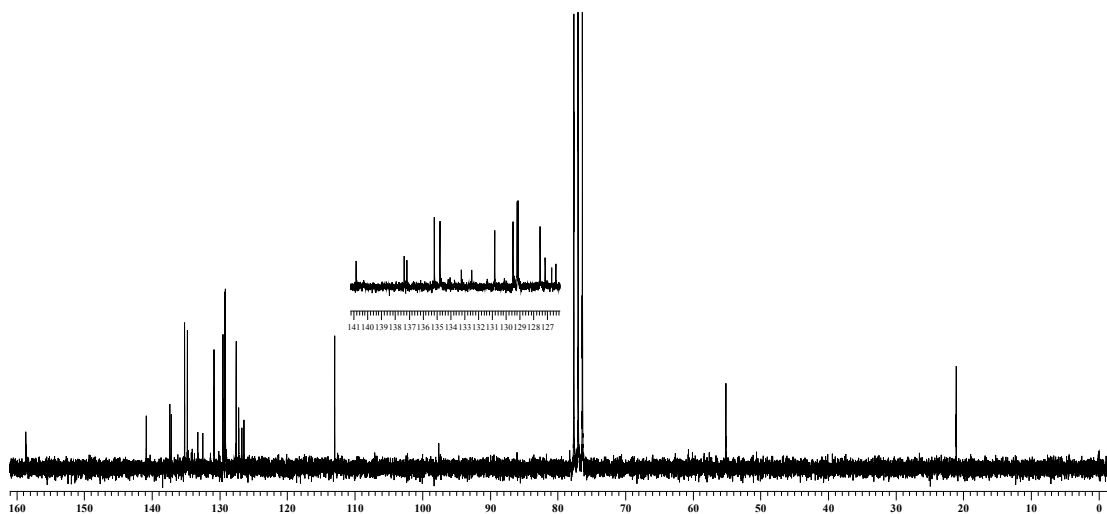

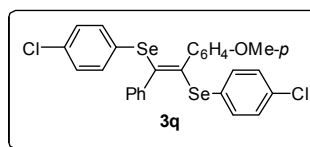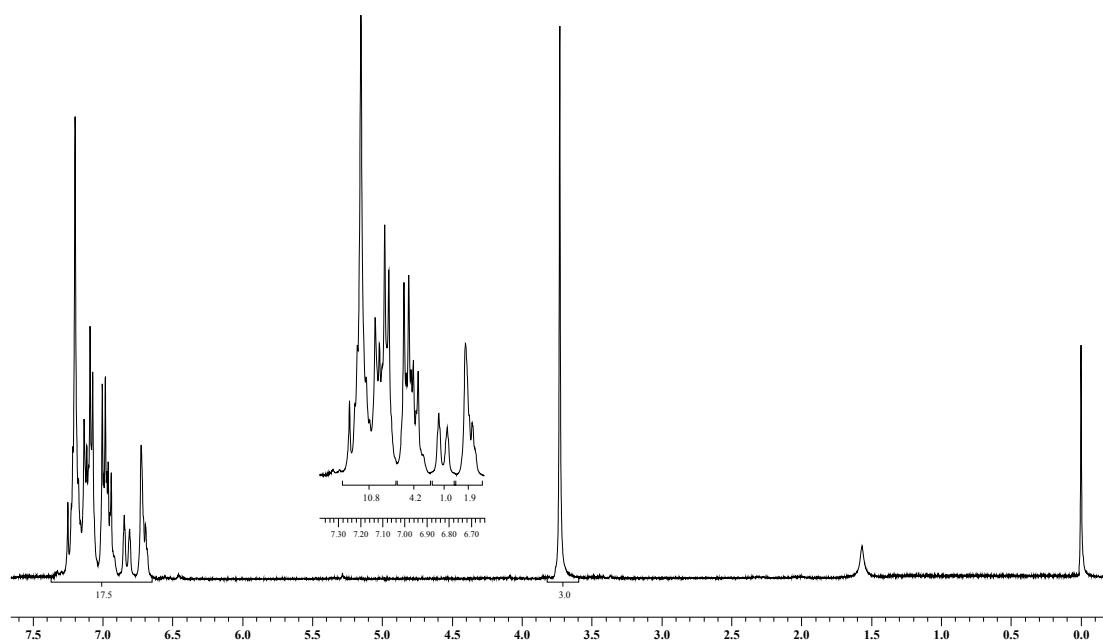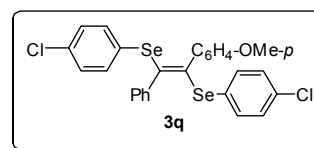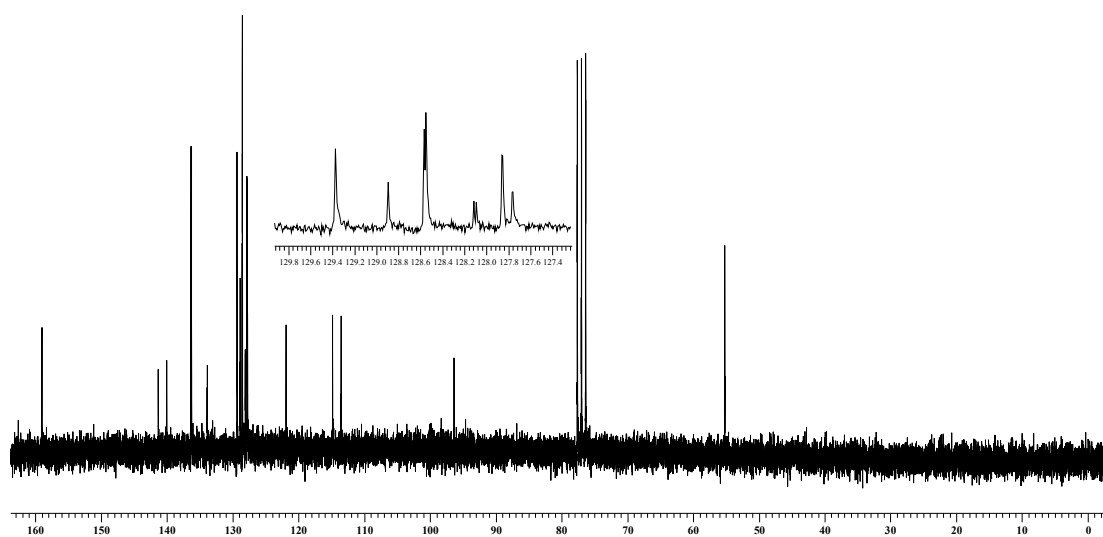



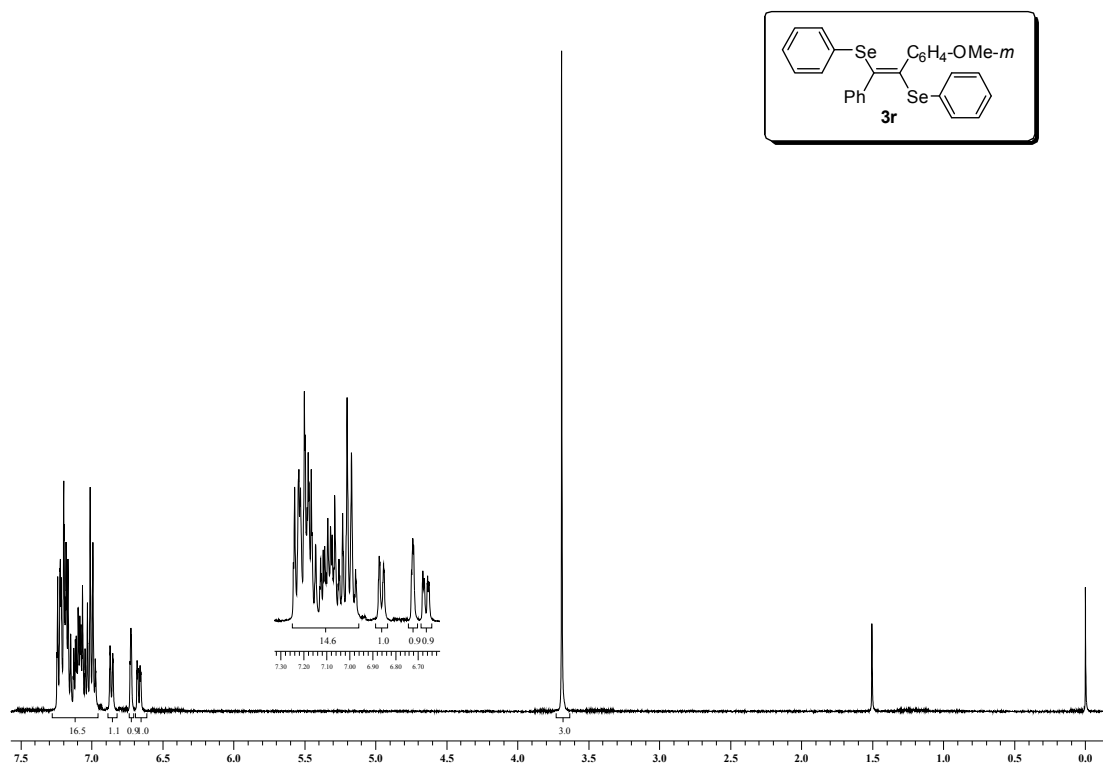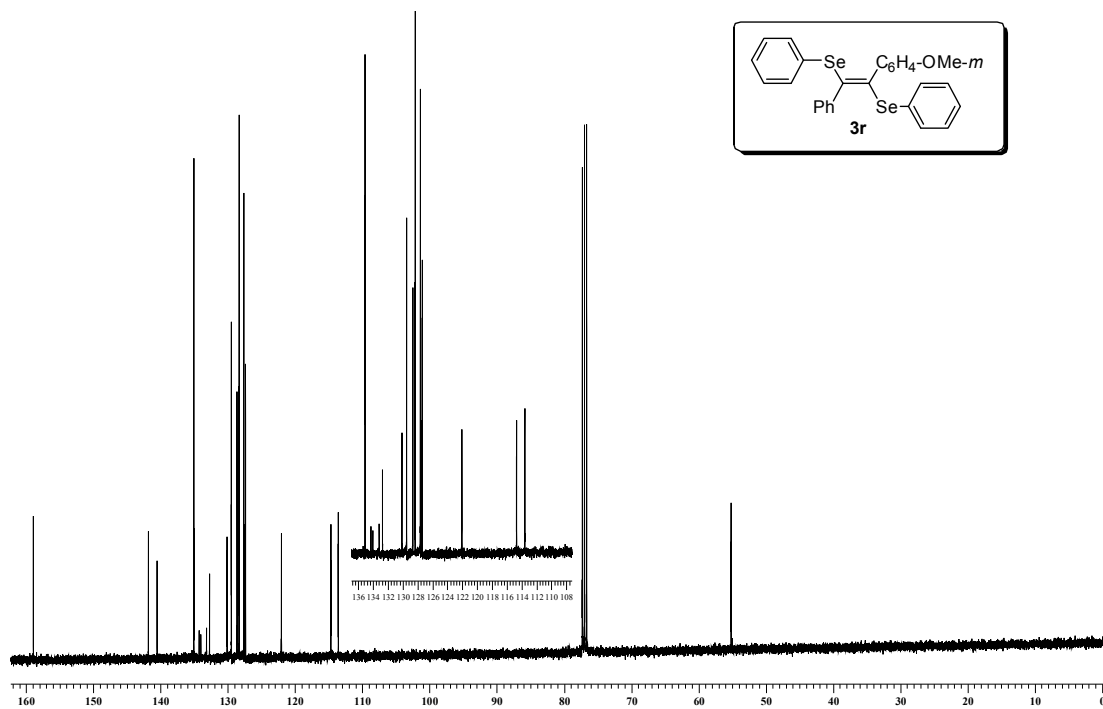

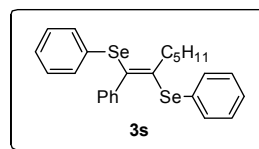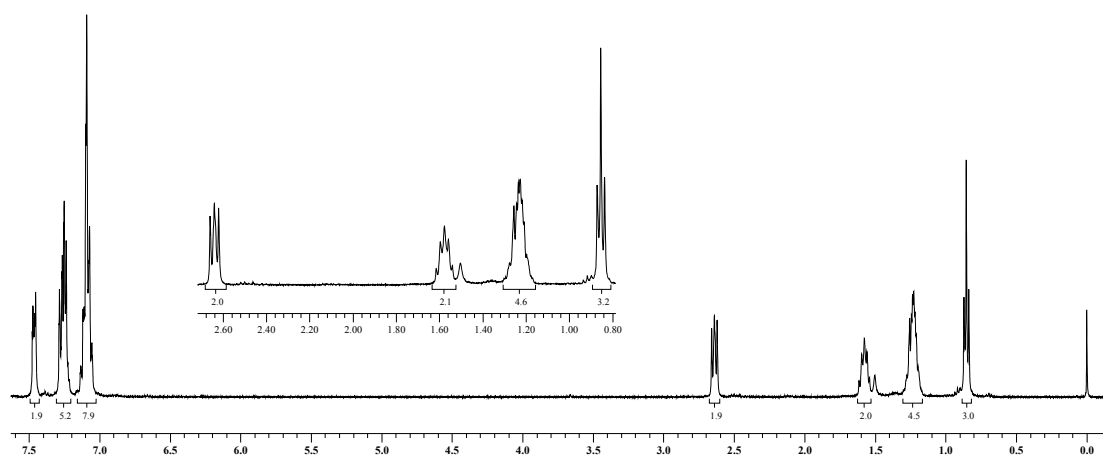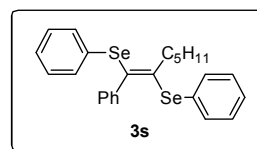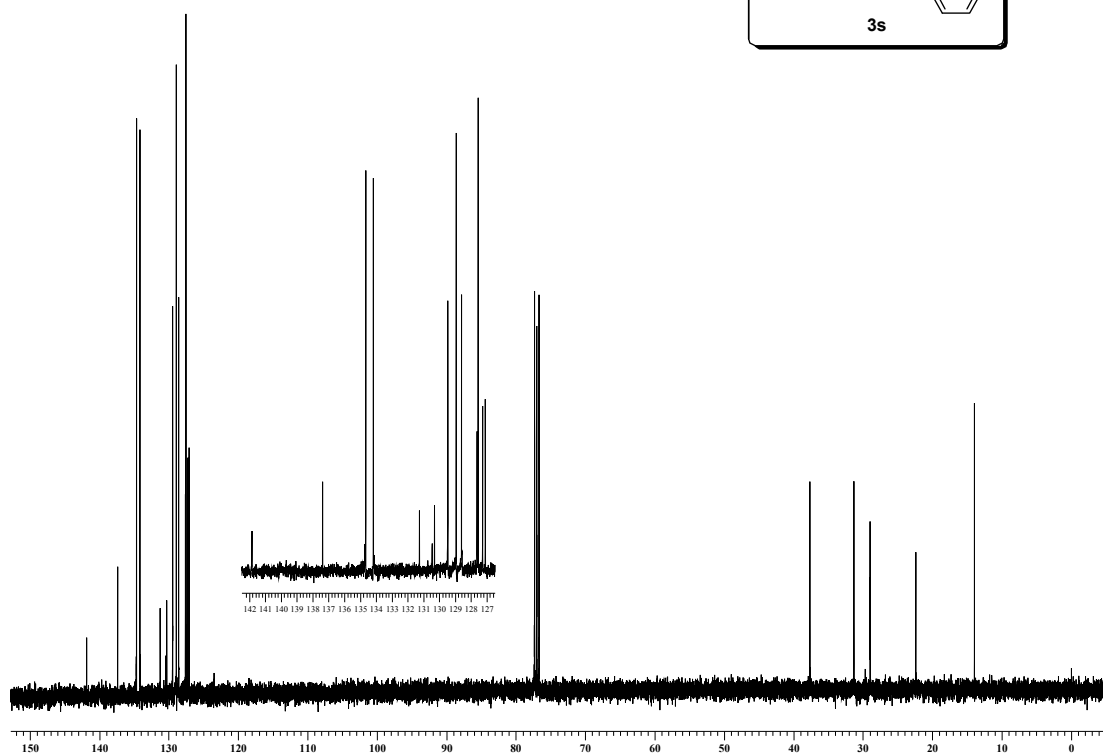

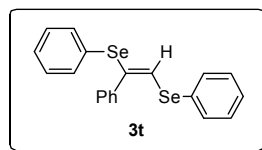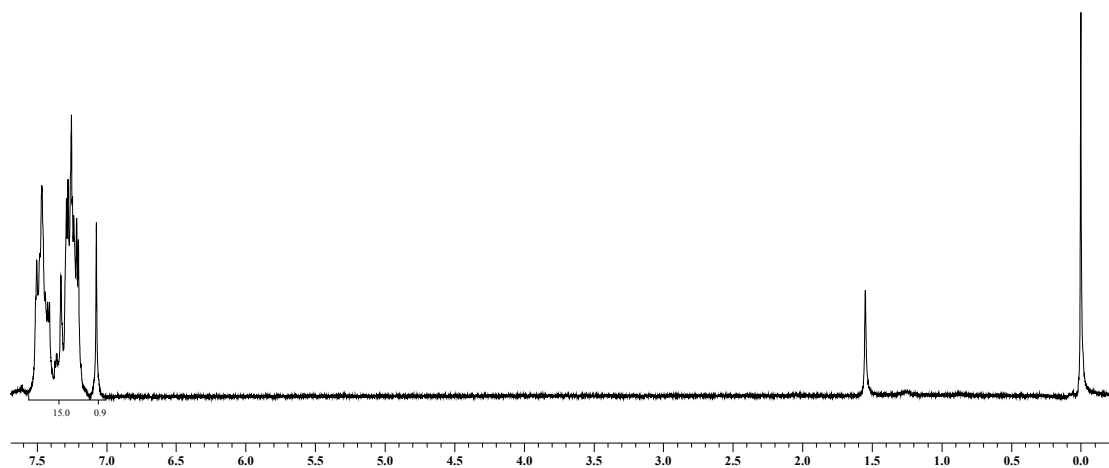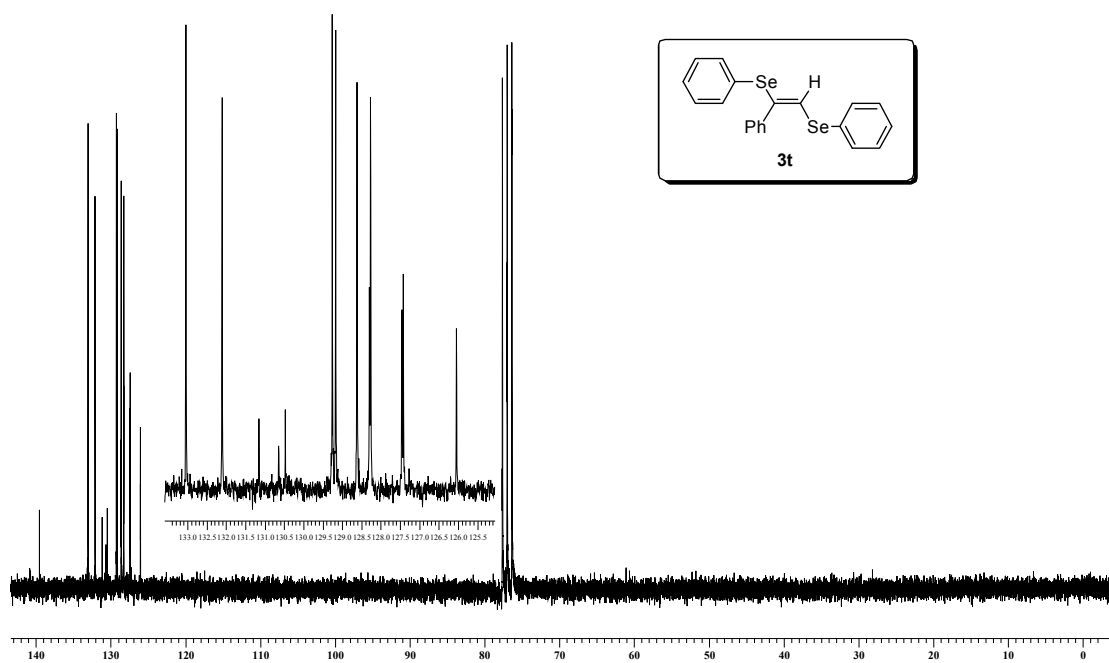

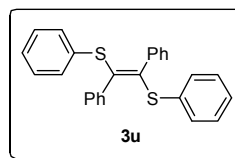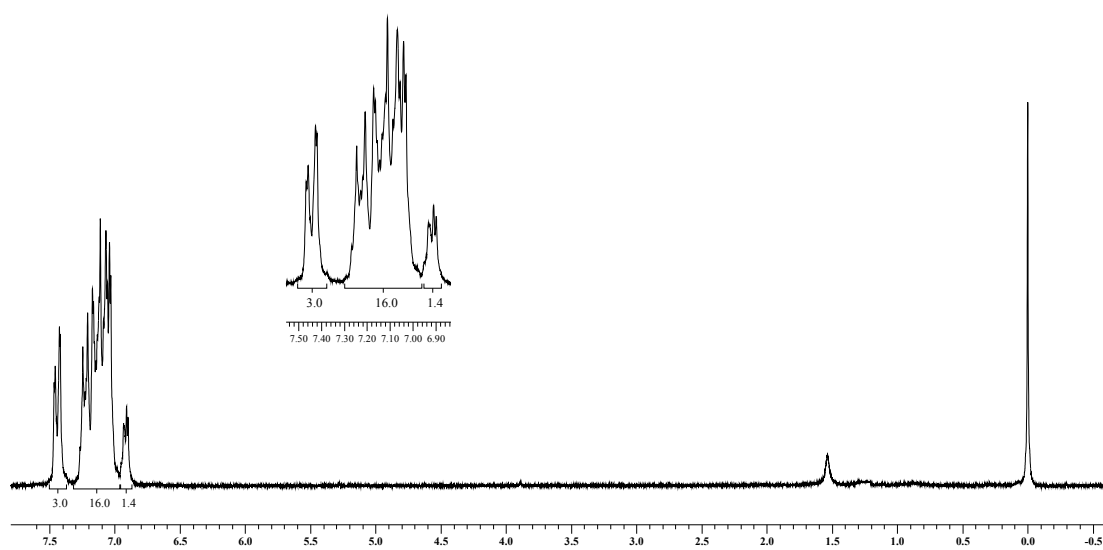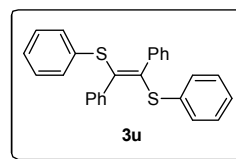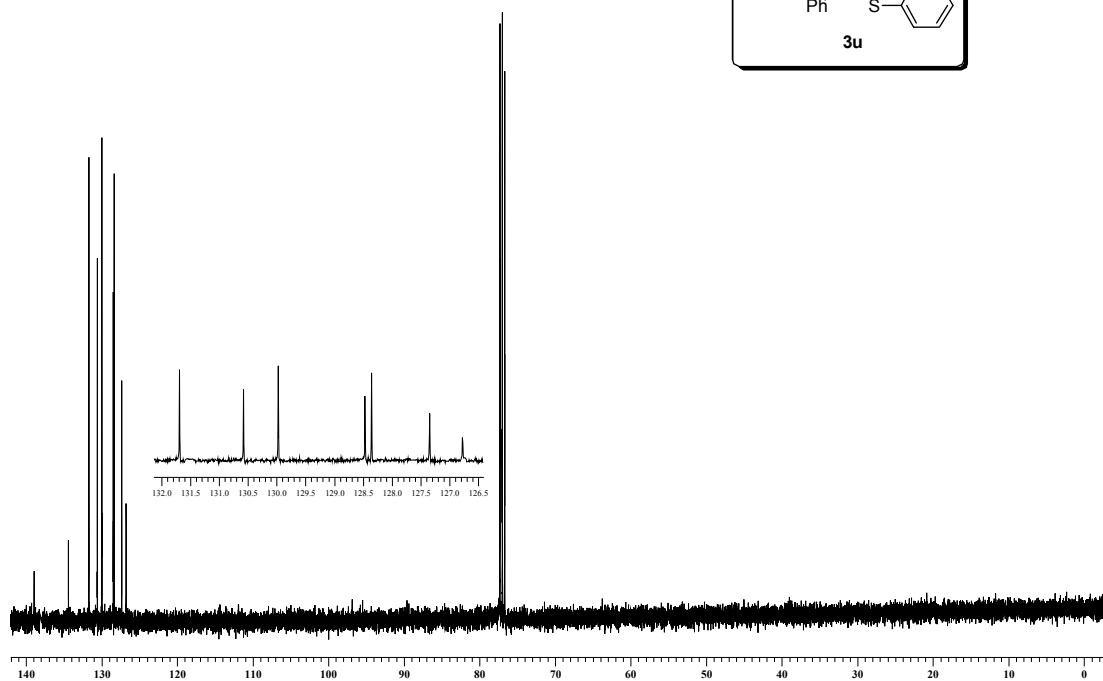

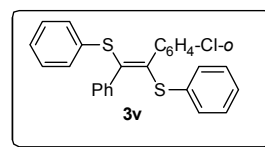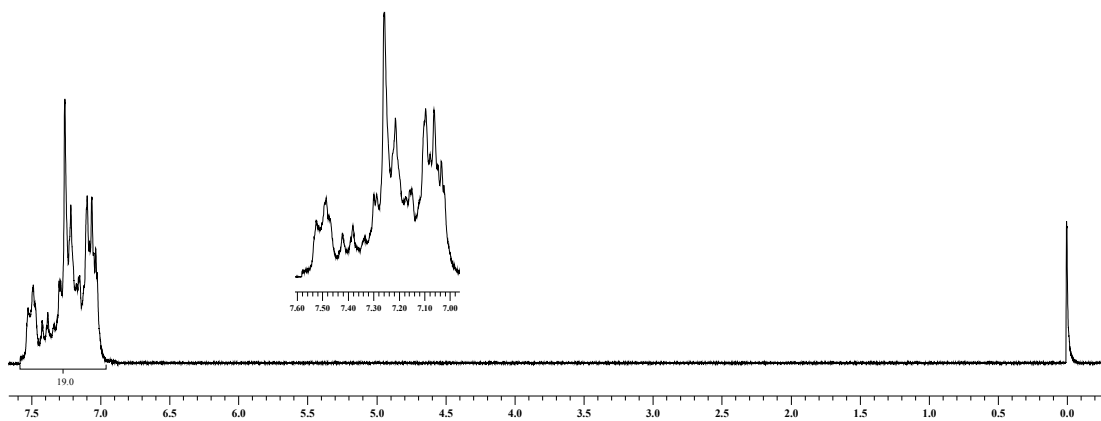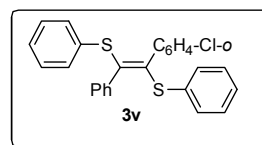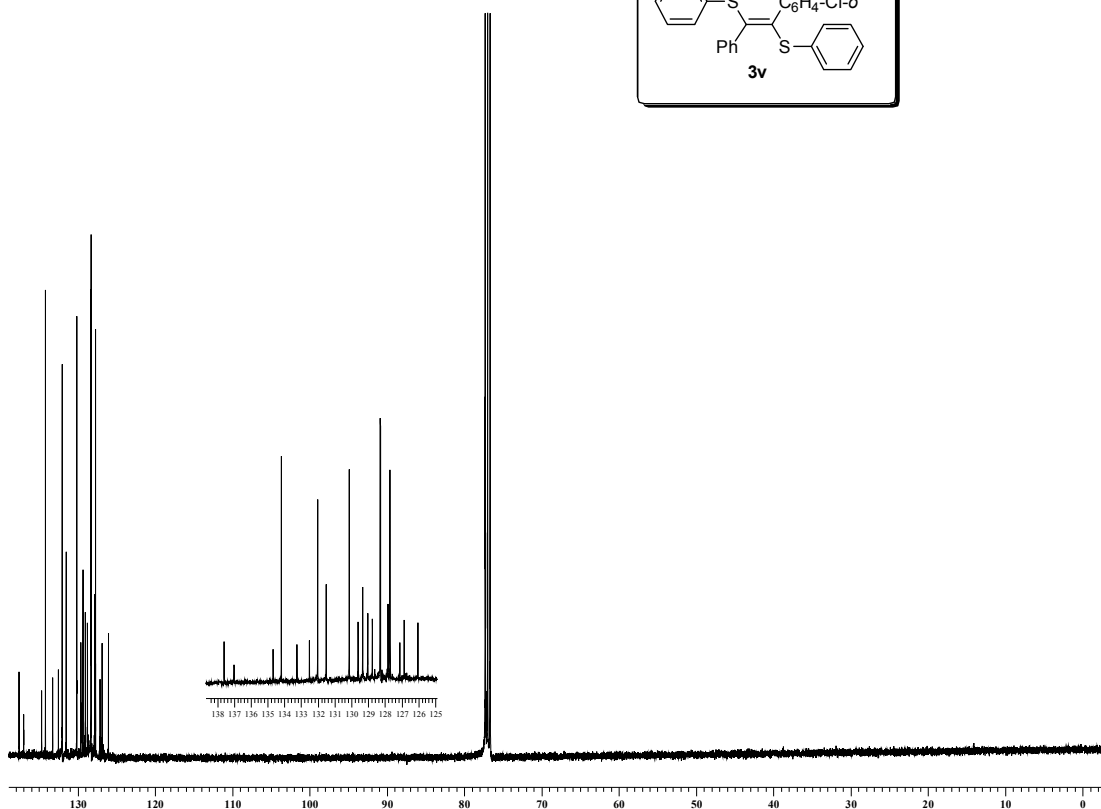

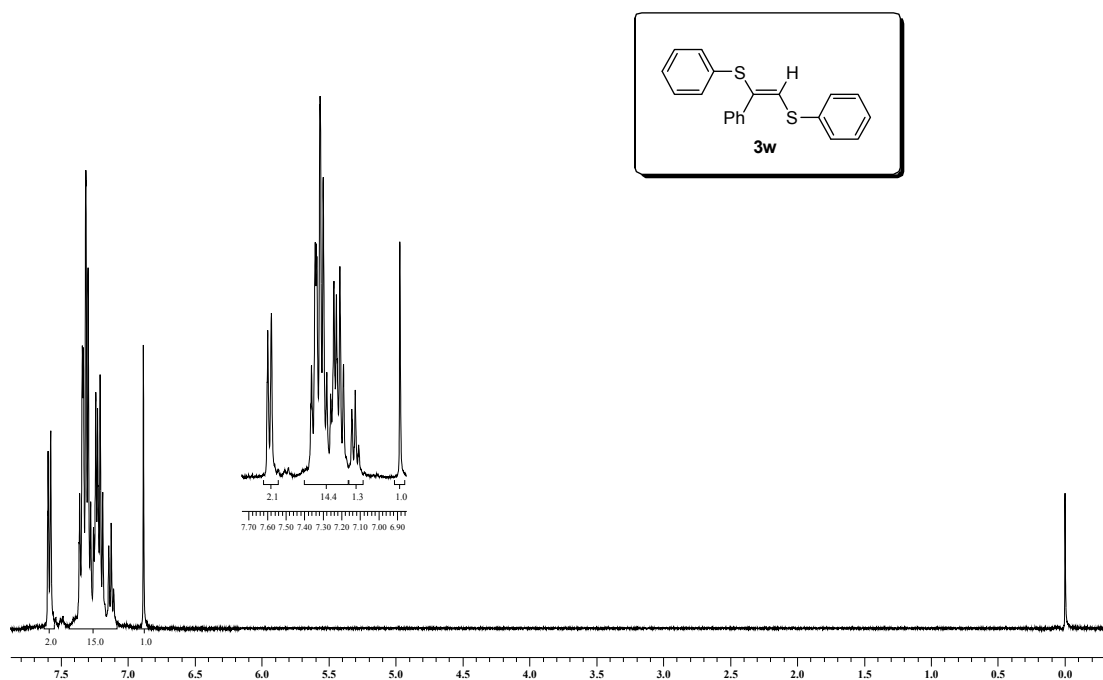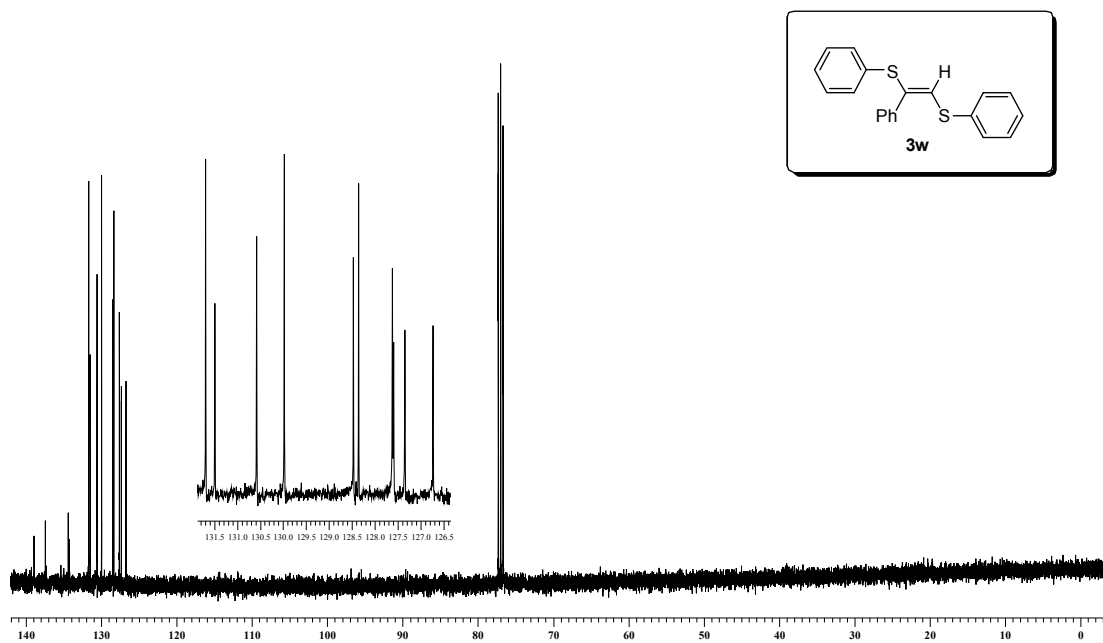

Supplement: c2ob27064a.pdf [file c2ob27064a.pdf]
